1 **Title**

2 Fam49b dampens TCR signal strength to regulate survival of positively selected thymocytes

3

4 **Authors**

5

6 Chan-Su Park<sup>1\*</sup>, Jian Guan<sup>1</sup>, Peter Rhee<sup>1</sup>, Federico Gonzalez<sup>2</sup>, Laurent Coscoy<sup>3</sup>, Ellen A. Robey<sup>3\*</sup>, Nilabh  
7 Shastri<sup>1\*</sup>, Scheherazade Sadegh-Nasseri<sup>1\*</sup>

8

9 <sup>1</sup>Department of Pathology, The Johns Hopkins University School of Medicine, Baltimore, Maryland, USA

10 <sup>2</sup>Department of Nutritional Sciences and Toxicology, University of California, Berkeley, California, USA

11 <sup>3</sup>Department of Molecular and Cell Biology, University of California, Berkeley, California, USA

12

13 \* Corresponding author. [cpark52@jh.edu](mailto:cpark52@jh.edu)

14

15

16 **Running title:** Fam49b regulates thymocyte negative selection

17 **Abbreviation**

18

|             |                                               |
|-------------|-----------------------------------------------|
| TCR         | T cell receptor                               |
| Fam49a      | Family with sequence similarity 49 member A   |
| Fam49b      | Family with sequence similarity 49 member B   |
| DN          | double negative                               |
| DP          | double positive                               |
| SP          | single positive                               |
| Rho-GTPases | Rho family of small guanosine triphosphatases |
| GEFs        | guanine nucleotide exchange factors           |
| GAPs        | GTPase-activating proteins                    |
| IELs        | intraepithelial lymphocytes                   |
| Treg cells  | Regulatory T cell                             |
| iNKT cells  | invariant natural killer T cells              |
| APCs        | antigen presenting cells                      |

19

## 20 Abstract

21 The fate of developing T cells is determined by the strength of T cell receptor (TCR) signal they receive in the  
22 thymus. This process is finely regulated through tuning of positive and negative regulators in thymocytes. The  
23 Family with sequence similarity 49 member B (Fam49b) protein is a newly discovered negative regulator of  
24 TCR signaling that has been shown to suppress Rac-1 activity *in vitro* in cultured T cell lines. However, the  
25 contribution of Fam49b to thymic development of T cells is unknown. To investigate this important issue, we  
26 generated a novel mouse line deficient in Fam49b (Fam49b-KO). We observed that Fam49b-KO double  
27 positive (DP) thymocytes underwent excessive negative selection, whereas the positive selection stage was  
28 unaffected. This altered development process resulted in significant reductions in CD4 and CD8 single positive  
29 thymocytes as well as peripheral T cells. Interestingly, a large proportion of the TCR $\gamma\delta^+$  and CD8 $\alpha\alpha^+$ TCR $\alpha\beta^+$   
30 gut intraepithelial T lymphocytes were absent in Fam49b-KO mice. Our results demonstrate that Fam49b  
31 dampens thymocytes TCR signaling in order to escape negative selection during development, uncovering the  
32 function of Fam49b as a critical regulator of selection process to ensure normal thymocyte development.

33  
34  
35 **Keywords:** Fam49b, Rac, Cytoskeleton remodeling, T cell development, Negative selection, Intraepithelial T  
36 cells

## 37 Introduction

38 Developing T cells in the thymus follow an ordered progression from CD4<sup>-</sup>CD8<sup>-</sup> double negative (DN),  
39 to CD4<sup>+</sup>CD8<sup>+</sup> double positive (DP), and finally to CD4 or CD8 single positive (SP) T cells [1]. Positive  
40 selection, negative selection, and CD4/CD8 lineage fate commitment of DP thymocytes rely on the strength of  
41 the interactions between TCR and self-peptides-MHC complexes [2]. Inadequate interactions lead to “death by  
42 neglect” whereas overly strong interactions lead to the elimination of thymocytes through “negative selection”.  
43 Thus, only those T cells receiving a moderate TCR signal strength are positively selected and further develop  
44 into mature T cells [2-4]. The TCR signal strength is also critical for CD4/CD8 lineage commitment. Enhancing  
45 TCR signaling in developing thymocytes favors development to the CD4 lineage, whereas reducing TCR  
46 signaling favors development of the CD8 lineage [5, 6].

47  
48 While the majority of thymocytes bearing high affinity TCR for self-peptide MHC complexes undergo  
49 negative selection, not all self-reactive thymocytes follow this rule. Instead, these subsets of self-reactive non-  
50 deleting thymocytes are diverted to alternative T cell lineages through a process known as agonist selection [7,  
51 8]. Several agonist selected T cell subsets has been defined including the CD8 $\alpha^+$ TCR $\alpha\beta^+$  intraepithelial  
52 lymphocytes (CD8 $\alpha^+$ TCR $\alpha\beta^+$  IELs), invariant natural killer T cells (iNKT cells), and Foxp3<sup>+</sup> Regulatory T  
53 cells (Treg cells) [9-11]. Functionally, agonist selected T cells are thought to have a regulatory role in the  
54 immune system.

55  
56 Actin cytoskeleton dynamics are important for multiple aspects of T cell function, including TCR  
57 signaling and adhesion, migration, differentiation, and execution of effector function [12-14]. In particular, actin  
58 cytoskeleton remodeling is required to provide scaffolding for TCR signaling proteins and for maintaining a  
59 stable immunological synapse between T cells and antigen presenting cells (APCs) [15-17]. However, the  
60 mechanisms that link actin cytoskeleton dynamics to the T cell signaling are not well understood. It has been  
61 reported that T cells cytoskeletal reorganization and regulation of actin dynamics at the immunological synapse  
62 are regulated by Rho family of small guanosine triphosphatases (Rho-GTPases) such as Rac [12]. Most  
63 members of Rho-GTPases exists in two conformational states between inactive (GDP-bound) and active (GTP-  
64 bound) [18]. The switch between the GDP- and GTP-bound is tightly regulated by guanine nucleotide exchange  
65 factors (GEFs) and GTPase-activating proteins (GAPs). GEFs activate Rho-GTPases by promoting the  
66 exchange of GDP for GTP, whereas GAPs inhibit Rho-GTPases by stimulating their GTP hydrolysis activity.  
67 Vav family proteins (Vav1, Vav2 and Vav3) are GEFs for Rac. Active Rac-1 transduce signals by binding to  
68 effector protein such as PAK and WAVE2 complex. Vav, Rac, and Pak play crucial roles in T cell

69 development. For example, studies of mice lacking Vav-1 have shown that T cell development is partially  
70 blocked at pre-TCR  $\beta$  selection and is strongly blocked in both positive and negative selection [19-21]. Mice  
71 lacking both isoforms of Rac1 and Rac2 show defects in pre-TCR  $\beta$ -selection at DN thymocytes and positive  
72 selection of DP thymocytes [22, 23]. Mice lacking Pak2 show defects in pre-TCR  $\beta$ -selection of DN  
73 thymocytes, positive selection of DP thymocytes, and maturation of SP thymocytes [24].

74  
75 Fam49b has been identified as an inhibitor of TCR signaling through binding with active Rac-1/2 in  
76 Fam49b-KO Jurkat T cells [25]. Those studies showed that lack of Fam49b led to hyperactivation of Jurkat T  
77 cells following TCR stimulation, as measured by the enhancement of CD69 induction, Rac-PAK axis signaling,  
78 and cytoskeleton reorganization [25]. Since TCR signaling strength controls thymocyte development, we  
79 hypothesized that Fam49b would be critical for thymocyte development *in vivo* and investigated this using a  
80 novel knockout mouse line. Here, we found the Fam49b was dispensable for positive selection but was required  
81 to prevent overly robust elimination of thymocytes at the negative selection stage, thus identifying Fam49b as a  
82 critical regulator of negative selection.

## 83 **Result.**

### 84 **Generation of Fam49b-KO mice and Fam49a-KO mice**

85 To assess the role of Fam49b in T cell development, we generated Fam49b-KO mice by creating a premature  
86 stop codon in exon 6 of the *Fam49b* locus using CRISPR/Cas9 (**Fig. 1A**). Fam49a is a homologous protein that  
87 is ~80% identical to Fam49b that has also been suggested to be involved in lymphopoiesis in zebrafish [26]. We  
88 generated Fam49a-KO mice in a similar manner by creating a stop codon in exon 7 of the *Fam49a* locus  
89 (**Fig.1B**). Immunoblot of spleen tissues confirmed that Fam49a or Fam49b expression was undetectable in  
90 Fam49a-KO mice or Fam49b-KO mice respectively in contrast to wild type (WT, C57BL/6J) mice (**Fig. 1C**).  
91 Real-time RT-PCR analysis of flow cytometry-sorted WT thymocytes subsets showed Fam49b is expressed  
92 broadly throughout thymic development, whereas Fam49a was mainly expressed in mature T cells (**Fig. 1D** and  
93 **Supplementary Fig. 1**). The expression of Fam49a was not detectable in WT thymocytes (**Fig. 1D**). Both  
94 Fam49a-KO and Fam49b-KO mice were fertile and did not show any apparent abnormalities.

### 96 **Defective T cell development in Fam49b-KO mice, but not Fam49a-KO mice.**

97 Flow cytometry analysis of cells isolated from lymph nodes showed that the frequency and number of  
98 peripheral CD4<sup>+</sup> T cells and CD8<sup>+</sup> T cells were significantly reduced in Fam49b-KO mice (**Fig. 2A**) compared  
99 to WT and Fam49a-KO mice. Notably, reduction in the number of CD8<sup>+</sup> T cells was greater than that of CD4<sup>+</sup>  
100 T cells. As a result, the ratio of CD4<sup>+</sup> T cells over CD8<sup>+</sup> T cells was increased in Fam49b-KO mice (**Fig. 2B**). In  
101 contrast, Fam49a-KO mice resembled WT mice in terms of T cell number and CD4/CD8 composition.  
102 Peripheral T cells in naïve mice can be divided into naïve and memory T subpopulation, which can be  
103 distinguished based on the expression of adhesion molecule CD62L and CD44. Assessment of the phenotype of  
104 peripheral T cells indicated that the reduction in T cell numbers was mainly due to a reduced number of naïve  
105 (CD44<sup>lo</sup> CD62L<sup>+</sup>) CD4<sup>+</sup> and CD8<sup>+</sup> T cells in Fam49b-KO mice, while the size of the memory population was  
106 unchanged (**Fig. 2C**). Again, little difference was observed between Fam49a-KO and WT mice in terms of the  
107 phenotype of peripheral T cell subsets.

109 To further investigate if the decrease in naïve peripheral T cells subset in Fam49b-KO mice was due to defects  
110 of T cell development, we analyzed the surface expression of CD4 and CD8 on thymocytes. The frequencies of  
111 CD4 SP and CD8 SP cells were reduced and the ratios of CD4 SP to CD8 SP thymocytes were increased in  
112 Fam49b-KO mice thymi (**Fig. 2D** and **Supplementary Fig. 2**). These data indicate that Fam49b deficiency

113 leads to impaired thymocyte development for both CD4<sup>+</sup> and CD8<sup>+</sup> T cells, with a more marked impact on the  
114 CD8<sup>+</sup> T cell population. In contrast, loss of Fam49a showed little, if any, impacts on T cell numbers and  
115 cellularity in periphery, or T-cell thymic development. Given a lack of any phenotypic changes in Fam49a-KO  
116 mice T cells, together with an absence of Fam49a expression in thymus (**Fig. 1D**), we concluded that Fam49a is  
117 unlikely to play a significant role in T cell development. We therefore focused the remainder of our studies on  
118 the Fam49b-KO mice.

### 119 120 **Fam49b-KO thymocytes initiate positive selection but fail to complete development**

121 Successful T cell development is a combined effort of both thymocytes and thymic microenvironment such as  
122 thymic epithelial cells and cytokine production. To determine if the effect of Fam49b deficiency on thymocytes  
123 development was thymocyte intrinsic or dependent on the extrinsic thymic microenvironment, we generated  
124 bone marrow chimera by injecting WT or Fam49b-KO CD45.2<sup>+</sup> bone marrow cells into lethally irradiated WT  
125 CD45.1<sup>+</sup> mice (B6.SJL-Ptprca Pepcb/BoyJ). A lower frequency of peripheral T cells (**Fig. 3A**) and increased  
126 ratio of peripheral CD4<sup>+</sup> T over CD8<sup>+</sup> T was observed in Fam49b-KO chimera mice compared to WT chimera  
127 mice (**Fig. 3B**). The Fam49b-KO thymocytes developed in WT thymic environment are like those developed in  
128 the germline Fam49b-KO environment in terms of both thymocyte and peripheral lymphocyte phenotypes.  
129 Therefore, the effect of Fam49b mutation on T cell development is predominantly due to thymocyte intrinsic  
130 functions.

131  
132 Next, we sought to determine which step of T cell development was altered in Fam49b-KO mice. We thus  
133 subdivided thymocytes into four stages based on the differential expression of TCR $\beta$  and CD69 expression (**Fig.**  
134 **3C** and **Supplementary Fig. 2**) [27]. The proportion of stage 1 thymocytes (TCR $\beta$ <sup>lo</sup>CD69<sup>-</sup>), which include the  
135 DN and pre-selection DP cells, was similar between WT and Fam49b-KO mice. The percentage of stage 2  
136 thymocytes (TCR $\beta$ <sup>int</sup>CD69<sup>+</sup>), which represent transitional DP undergoing TCR-mediated positive selection, was  
137 significantly higher in the Fam49b-KO mice. The proportion of late stage thymocytes including the post-  
138 positive selection (TCR $\beta$ <sup>hi</sup>CD69<sup>+</sup>) and the mature thymocytes (TCR $\beta$ <sup>hi</sup>CD69<sup>-</sup>) was markedly decreased (**Fig**  
139 **3C**). Consistent with our observation in periphery, the increased ratio of CD4 SP to CD8 SP was observed  
140 among the late stage thymocytes (TCR $\beta$ <sup>hi</sup>CD69<sup>+</sup> and TCR $\beta$ <sup>hi</sup>CD69<sup>-</sup>) in Fam49b-KO mice (**Fig 3D**). These data  
141 show that the post-positive-selection process is impaired in Fam49b-KO thymocyte.

We further distinguished the pre-and post-positive selection populations by expression of cell surface TCR $\beta$  and CD5 (**Fig. 3E** and **Supplementary Fig. 3**) [27]. These markers define a developmental progression: stage 1 (TCR $\beta^{\text{lo}}$ CD5 $^{\text{lo}}$ ) represents the pre-selection phase of DP thymocytes, and Stage 2 (TCR $\beta^{\text{lo}}$ CD5 $^{\text{int}}$ ) are cells initiating positive selection. Stage 3 (TCR $\beta^{\text{int}}$ CD5 $^{\text{hi}}$ ) represents thymocytes in the process of undergoing positive selection, and Stage 4 (TCR $\beta^{\text{hi}}$ CD5 $^{\text{hi}}$ ) consists primarily of post-positive selection SP thymocytes. We observed that all the early phase populations (TCR $\beta^{\text{lo}}$ CD5 $^{\text{lo}}$ , TCR $\beta^{\text{lo}}$ CD5 $^{\text{int}}$ , TCR $\beta^{\text{int}}$ CD5 $^{\text{hi}}$ ) increased significantly in proportion in Fam49b-KO, whereas the post-positive selection SP thymocytes (TCR $\beta^{\text{hi}}$ CD5 $^{\text{hi}}$ ) were markedly decreased (**Fig. 3E**). Similarly, an increased ratio of CD4 SP to CD8 SP was observed in the post-positive selection population (TCR $\beta^{\text{hi}}$ CD5 $^{\text{hi}}$ ) in Fam49b-KO thymocytes (**Fig. 3F**). This phenotype was further verified by the observation of lower percentage of mature SP CD24 $^{\text{lo}}$ TCR $\beta^{\text{hi}}$  cells in Fam49b-KO mice compared with WT mice (**Fig. 3G**). Taken together, these results suggest that positive selection remains mostly unaffected by lack of Fam49b molecule, while Fam49b plays a more important role in the later stages of T cell development in the thymus.

### Enhanced negative selection in Fam49b-KO thymocytes

Based on our observation that loss of Fam49b led to decreased mature thymocyte populations, together with evidence that Fam49b can negatively regulate TCR signaling [25], we hypothesized that enhanced clonal deletion due to elevated TCR signaling strength would lead to the loss of positively selected thymocytes in Fam49b-KO mice. To test this hypothesis, we assessed cleavage of caspase 3, one of the key apoptosis events during clonal deletion (**Supplementary Fig. 4**) [28]. In the thymus, caspase 3 is cleaved in the apoptotic cells due to either clonal deletion (i.e. negative selection) or death by neglect (i.e. failed positive selection). To distinguish between these two fates, we stained the cells for TCR $\beta$  and CD5 molecules which are upregulated upon TCR stimulation. Thus, cleaved-caspase3 $^+$ TCR $\beta^{\text{hi}}$ CD5 $^{\text{hi}}$  cells represent thymocytes undergoing clonal deletion, whereas cleaved-caspase 3 $^+$ TCR $\beta^-$ CD5 $^-$  cells represent thymocytes undergoing death by neglect. We observed that the frequency of cells undergoing clonal deletion was increased among Fam49b-KO thymocytes, whereas the frequencies of cells to be eliminated through death by neglect were similar between Fam49b-KO and WT mice (**Fig. 4A**).

Negative selection can occur in the thymic cortex as DP thymocytes are undergoing positive selection or in the thymic medulla after positive selection [29]. To determine whether loss of Fam49b led to increased deletion in the cortex or medulla, we stained the thymocytes for CCR7, which marks medullary thymocytes and is the



174 receptor for the medullary chemokines CCL19/21 [28, 30]. The frequencies of cleaved-caspase<sup>3</sup>CCR7<sup>-</sup> cells  
175 and cleaved-caspase<sup>3</sup>CCR7<sup>+</sup> cells were significantly increased in the Fam49b-KO mice, suggesting that more  
176 thymocytes were eliminated through clonal deletion in both the cortex and medulla of Fam49b-KO thymus as  
177 compared with WT thymus (**Fig. 4A**).

178  
179 Next, to determine if TCR-signal strength in Fam49b-KO thymocyte was increased, we assessed the surface  
180 expression of CD5 and CD69, two surrogate markers for TCR-signal strength [31, 32]. We found that both CD5  
181 and CD69 expressions were upregulated on Fam49b-KO DP thymocytes, but not on CD4 SP and CD8 SP  
182 thymocytes (**Fig. 4B**), suggesting Fam49b-KO DP thymocytes had received stronger TCR signaling than the  
183 WT thymocytes. We next investigated the TCR-signaling strength of Fam49b-KO peripheral T cells by  
184 measuring IL-2 production in response to anti-CD3 $\epsilon$  stimulation. Peripheral T cells were purified from spleen  
185 and lymph nodes from WT or Fam49b-KO mice and were stimulated in anti-CD3 $\epsilon$  Ab coated plates for 3 days.  
186 We observed that IL-2 production was strongly elevated in Fam49b-KO CD4<sup>+</sup>CD25<sup>-</sup> and CD8<sup>+</sup> T cells  
187 compared to WT T cells (**Fig. 4C**). Despite the high IL-2 production of these cells, proliferation of both  
188 CD4<sup>+</sup>CD25<sup>-</sup> and CD8<sup>+</sup> Fam49b-KO T cells in response to anti-CD3 $\epsilon$  stimulation *in vitro* were similar to that of  
189 WT T cells (**Supplementary Fig. 5**). In summary, enhanced TCR-signaling strength intrinsic to Fam49b-KO  
190 DP thymocytes leads to excessive clonal deletion in the cortex and medulla, resulting in the loss of naïve mature  
191 T cells in both thymus and periphery in the mice.

### 192 193 **Impaired development of natural IELs in Fam49b-KO mice.**

194 Some self-reactive thymocytes rely on strong TCR signaling to mature into unconventional T cell subsets  
195 through utilizing an alternative selection process known as agonist selection [33, 34]. Due to the robust effects  
196 of Fam49b deficiency on TCR-signaling strength, we investigated whether Fam49b affects the development of  
197 well-known agonist selected T cell subsets including CD8 $\alpha\alpha$ <sup>+</sup>TCR $\alpha\beta$ <sup>+</sup> IELs in small intestinal epithelium, iNKT  
198 cells in liver, and Treg cells in lymph nodes [9-11]. We found that all three T cell subsets were differentially  
199 affected by the loss of Fam49b. The percentage of CD8 $\alpha\alpha$ <sup>+</sup>TCR $\alpha\beta$ <sup>+</sup> IELs among IEL T cells was significantly  
200 decreased from 60% in WT mice to 30% in Fam49b-KO mice, whereas the frequency of liver iNKT cells was  
201 unaffected (**Fig. 5A**). The frequency of Treg among lymph node CD4<sup>+</sup> T cells increased slightly from 16% to  
202 20% in lymph nodes in Fam49b-KO mice, though the absolute number of Treg was ~80% of the number in WT  
203 mice. Enhanced frequency of Treg seems to be a result of greater reduction of total CD4<sup>+</sup> T cells compared to  
204 Treg (**Fig. 5A** and **Supplementary Fig. 6A**).

205

206 Gut IEL T lymphocytes are extremely heterogenous, and based on the differentiation mechanisms, can be  
207 subdivided into two major subpopulations including natural intraepithelial lymphocytes (natural IELs) and  
208 induced intraepithelial lymphocytes (induced IELs) [35]. Natural IELs home to gut immediately after thymic  
209 maturation. They are  $\text{TCR}\gamma\delta^+$  and  $\text{TCR}\alpha\beta^+$  T cells that can be either  $\text{CD8}\alpha\alpha^+$  or  $\text{CD8}\alpha\alpha^-$ . In contrast, induced  
210 IELs arise from conventional peripheral  $\text{CD8}\alpha\beta^+\text{TCR}\alpha\beta^+$  T cells and are activated post-thymically in response  
211 to peripheral antigens. The two populations can be distinguished by the expression of CD5; natural IELs are  
212  $\text{CD5}^-$  and induced IELs  $\text{CD5}^+$ . Based on our observation of the dramatic loss of  $\text{CD8}\alpha\alpha^+\text{TCR}\alpha\beta^+$  IELs in  
213 Fam49b-KO mice, we postulated that other IEL subsets might be altered as well. Fam49b-KO mice showed a  
214 substantial reduction of natural IELs, including both the  $\text{TCR}\gamma\delta^+$  IELs as well as  $\text{CD8}\alpha\alpha^+\text{TCR}\alpha\beta^+$  IELs (**Fig.**  
215 **5B**), whereas the relative frequencies of induced IELs ( $\text{CD8}\alpha\beta^+\text{TCR}\alpha\beta^+$  IELs) were increased (**Fig. 5C** and  
216 **Supplementary Fig. 6B**). These results suggest that Fam49b is involved in shaping the agonist-selected  
217 unconventional T cell populations and that Fam49b deficiency leads to substantial loss of the natural IELs,  
218 including  $\text{CD8}\alpha\beta^+\text{TCR}\alpha\beta^+$  IELs and  $\text{TCR}\gamma\delta^+$  IELs.

## 219 Discussion

220 Development of T cells is critically dependent on the strength of signaling through the TCR that lead to positive  
221 or negative selection [36, 37]. However, the roles of additional intracellular proteins and signaling pathways  
222 that regulate TCR signaling strength in the thymus have not been fully elucidated. Here, by studying the thymic  
223 development of T cells in Fam49b-KO mice, we report that Fam49b finetunes thymic selection by negatively  
224 regulating TCR signal-strength in the thymus and is essential for normal thymocyte development. Mice  
225 deficient in Fam49b developed severe T cell lymphopenia due to enhanced TCR-signaling in DP thymocytes. In  
226 Fam49b-KO thymus, post-positively selected population was significantly reduced, while generation of DN or  
227 immature DP thymocytes was mostly unaffected. We further confirmed that the loss of post-positive selection  
228 thymocytes in Fam49b-KO mice was due to enhanced clonal deletion instead of death by neglect. As a result,  
229 the frequencies of CD4 SP and CD8 SP cells in the Fam49b-KO thymi were significantly reduced.

230  
231 While the medulla is a specialized site for negative selection, a substantial amount of negative selection occurs  
232 in the thymic cortex, overlapping in space and time with positive selection [38, 39]. We found that the  
233 frequency of thymocytes undergoing clonal deletion was significantly increased in Fam49b-KO thymus, while  
234 the frequency of thymocytes undergoing death by neglect remained the same. Moreover, most of thymocytes  
235 undergoing clonal deletion were CCR7<sup>-</sup> cortex resident thymocytes (~65%) in both WT and Fam49b-KO  
236 thymus. These data imply that Fam49b is needed immediately after the initial positive selection stage to serve as  
237 a ‘brake’ which dampens TCR signaling, thus helping to avoid negative selection. This ‘brake’, once taken out  
238 of the picture, leads to overexuberant clonal deletion and subsequent loss of a large proportion of the mature T  
239 cells.

240  
241 Fam49b-KO DP thymocytes received stronger TCR signal compared to WT DP thymocytes. At the molecular  
242 level, Fam49b directly interacts with active Rac and negatively regulates its activity [25, 40, 41]. Rac plays key  
243 roles in cytoskeleton remodeling, signal transduction, and regulation of gene expression in thymocytes and  
244 peripheral T cells [42, 43]. The modulation of Rac activity by switching between its two conformational states,  
245 i.e., inactive (GDP-bound) and active (GTP-bound), is essential for multiple stages of thymocyte development  
246 and maturation. Previous studies suggested that Rac activity is important for  $\beta$  selection at DN thymocytes as  
247 well as positive and negative selection at DP thymocytes [22, 42, 44]. Moreover, transgenic mice that express  
248 constitutively active Rac-1 mutant revealed that Rac-1 activity could reverse the fate of thymocytes from  
249 positive to negative selection in the thymus [45]. Taken together, the phenotype similarities between active Rac-  
250 1 transgenic and our Fam49b-KO mice, and the association between Rac and Fam49b molecule, suggests that

251 the impaired T-cell development in Fam49b-KO mice is likely a result of enhanced Rac activity in DP  
252 thymocytes.

253  
254 How might enhanced Rac activity lead to the defective T-cell development in Fam49b-KO mice? Rac is known  
255 to regulate actin reorganization in T cells through binding with the Rac downstream effectors, such as PAK and  
256 WAVE2 complex [13]. The Pak2-deficient CD4 thymocytes showed weakened TCR-signaling strength as  
257 indicated by reduction of Nur77 expression in response to  $\alpha$ CD3-stimulation [24], suggesting that the Rac-  
258 driven cytoskeleton remodeling is important for downstream events of TCR signaling. Negatively regulated  
259 Rac-driven cytoskeleton remodeling could attenuate protrusion and migration process in T cells. Fam49b-  
260 deficient cells showed increased cellular spread and reduced protrusion-retraction dynamics [40, 41]. Moreover,  
261 negative selection occurs via lengthy interactions between T cells and APCs, whereas positive selection are  
262 transient interactions [46]. Therefore, it is possible that altered cytoskeleton remodeling activity in Fam49b-KO  
263 thymocytes contributed to their elevated TCR-signaling strength and enhanced negative selection, perhaps by  
264 prolonging interactions with thymic APCs.

265  
266 Among all the unusual phenotypes of peripheral T cells in Fam49b-KO mice, one surprising yet interesting  
267 observation was the significant loss of  $CD8\alpha\alpha^+TCR\alpha\beta^+$  and  $TCR\gamma\delta^+$  IELs T cells. These T cell subsets were  
268 previously defined as unconventional T cells derived from self-reactive thymocytes that mature through agonist  
269 selection. The development of agonist-selected T cells relies on relatively strong and sustained TCR signaling  
270 which correlates with the magnitude of store-operated  $Ca^{2+}$  entry and NFAT activity [8, 33]. Yet it remains  
271 unclear why these cells that receive unusually high TCR signal are not eliminated through negative selection,  
272 but instead traffic into the gut and become IEL T cells [47, 48]. Interestingly, thymocytes undergoing agonist  
273 selection into  $CD8\alpha\alpha^+TCR\alpha\beta^+$  IELs T cells exhibited a rapid and confined migration pattern, in contrast to  
274 negatively selecting cells, which showed arrested migration [49]. It is tempting to speculate that overactivation  
275 of Rac-1 in Fam49b-KO mice might lead to negative selection of IEL precursors, perhaps by favoring migratory  
276 arrest over confined migration after encountering with agonist ligands.

277  
278 In conclusion, Fam49b is critical for the thymic development of conventional T cells as well as unconventional  
279 natural IELs T cells. Interestingly, the function of Fam49b is restrained to the late-phase T cell development,  
280 where it dampens TCR signals to avert negative selection of DP thymocytes. The action of Fam49b is key in  
281 distinguishing positive from negative selection in thymic development. Our study offered insights on the

282 association between modulation of TCR-signaling strength, cytoskeleton remodeling, and thymic development  
283 process.  
284

## 285 **Materials and Methods**

286 **Mice.** C57BL/6 (WT) and CD45.1 mice (B6.SJL-Ptprca Pepcb/BoyJ, stock no: 002014) were purchased from  
287 the Jackson Laboratory and bred in house. Fam49a-KO and Fam49b-KO mice were generated by CRISPR/Cas9  
288 gene-editing technology. The construct was electroporated into embryonic stem cells at the University of  
289 California at Berkeley gene targeting facility. All mouse procedures were approved by the Johns Hopkins  
290 University Animal Care and Use Committee and were following relevant ethical regulations.

## 291 **Antibodies and reagents.**

292 - Western blotting: anti-Fam49a (1103179) Millipore Sigma (St. Louis, MO); anti-Fam49b (D-8) Santa Cruz  
293 (Dallas, Texas); anti-GAPDH (ab9485) Abcam (Waltham, MA); anti-mouse IgG (926-68072), anti-rabbit IgG  
294 (926-32211) Li-cor (Lincoln, NE).

295 - Stimulation: anti-CD3e (145-2C11) was from BD Biosciences (San Jose, CA).

296 - Flow cytometry : anti-CD3e (17A2), anti-CD4 (RM4-5), anti-CD5 (53-7.3), anti-CD8 $\alpha$  (53-6.7), anti-CD8 $\beta$   
297 (53-5.8), anti-CD19 (ID3), anti-CD24 (M1/69), anti-CD25 (PC61), anti-CD44 (IM7), anti-CD45 (30-F11), anti-  
298 CD45.1 (A20), anti-CD45.2 (104), anti-CD45R/B220 (RA3-6B2), anti-CD62L (MEL-14), anti-CD69 (H1.2F3),  
299 anti-CD197/CCR7 (4B12), anti-Ly6G (IA8), anti-Ly-6C (HK1.4), anti-NK1.1 (PK136), anti-TCR $\beta$  (H57-597),  
300 anti-TCR $\gamma\delta$  (GL3), anti-H-2Kb (AF6-88.5); anti-CD16/32 (93) BioLegend (San Diego, CA); anti-CD11b  
301 (M1/70), anti-T-bet (4B10) BD Bioscience ; anti-Cleaved Caspase 3 (D3E9) Cell signaling (Danvers, MA);  
302 Foxp3 (FJK-16s) eBioscience (San Diego, CA).

303 - Tetramerization: PBS-57 loaded mouse CD1d monomers were synthesized by the Tetramer Core Facility of  
304 the US National Institute of Health, Streptavidin-APC (PJ27S) and Streptavidin-RPE (PJRS27) were purchased  
305 from Prozyme (Agilent, Santa Clara, CA).

306  
307  
308 **Immunoblotting.** Cell extracts were prepared by resuspending cells in PBS, then lysing them in RIPA buffer  
309 containing protease inhibitor cocktail (ThermoFisher Scientific, Waltham, MA). Protein concentrations were  
310 determined with the BCA Protein Reagent Kit (Pierce, ThermoFisher Scientific), after which 2-mercaptoethanol  
311 and 4x Laemmli Sample buffer (Bio Rad, Hercules, CA) were added and the samples were boiled. Western  
312 blotting was performed according to standard protocols using anti-Fam49a pAb, and anti-Fam49b mAb, and  
313 anti-GAPDH pAb. IRDye800CW conjugated goat anti-rabbit and IRDye680RD conjugated donkey anti-mouse  
314 were used as secondary antibodies. The membrane was scanned with the Odyssey Infrared Imaging System (Li-  
315 cor, model 9120)

317 **Real-time RT-PCR.** The subsets of C57BL/6 thymocytes was collected using BD FACSAria II Cell sorter by  
318 the Ross Flow Cytometry Core Facility of the Johns Hopkins. DN1 cells were gated as CD25<sup>-</sup>CD44<sup>hi</sup>; DN2  
319 cells were gated as CD25<sup>+</sup>CD44<sup>int-hi</sup>; DN3 cells were gated as CD25<sup>+</sup>CD44<sup>neg-lo</sup>; and DN4 cells were gated as  
320 CD25<sup>-</sup>CD44<sup>-</sup>. Total RNA was isolated using the RNeasy Plus Micro Kit (Qiagen, Germantown, MD) and  
321 cDNA was amplified by SuperScript IV First Strand Synthesis (Invitrogen, ThermoFisher Scientific) according  
322 to the manufacturer's instructions. Real-time PCR was performed using SYBRgreen PCR Master Mix (Applied  
323 Biosystems, ThermoFisher Scientific) and the ViiA 7 Real-Time PCR System (Applied Biosystems,  
324 ThermoFisher Scientific). Fam49b primers were forward, 5'-AGGAGCTGGCCACGAAATAC-3', and reverse,  
325 5'-GGCGTACTAGTCAAGGCTCC-3'. Results were normalized to β-actin expression with the 2-ΔCt  
326 method.

327  
328 **Isolation of immune cells.** Small-intestine IELs were isolated as previously described [50] : Changes were  
329 made as follow: DTT (BP172-5, Fisher Scientific) was used instead of DTE. Immune cells were collected from  
330 the interface of the 44% and 67% Percoll gradient and characterized by flow cytometry. Hepatic lymphocytes  
331 were isolated using Liver dissociation kit (Miltenyi Biotec, Auburn, CA) according to the manufacturer's  
332 instructions. Samples were resuspended in 33% Percoll and spun, and the cell pellet was collected and labeled  
333 for flow cytometry.

334  
335 **IL-2 ELISA and proliferation assay.** T cells were purified from spleen and lymph nodes by negative selection  
336 using Miltenyi Biotec MACS cell isolation kit. Cells were labeled with 5 μM CellTrace Violet Cell  
337 Proliferation Kit (Invitrogen, ThermoFisher Scientific) at room temperature for 10 mins. Staining cells was  
338 washed and cultured anti-mouse CD3ε antibody (1,2, 4 μg/mL) of coated plates for 72h. The amount of IL-2 in  
339 the supernatant was measured by ELISA and T cell proliferation was measured by CellTrace dilution analyzed  
340 by FACS.

341  
342 **Generation of bone marrow chimera.** T cell-depleted bone marrow cells from CD45.2<sup>+</sup> C57BL/6, Fam49a-  
343 KO mice, or Fam49b-KO mice (1x10<sup>6</sup> cells) were used to reconstitute sublethally irradiated (1000 rad) CD45.1<sup>+</sup>  
344 wild-type mice by i.v. injection. Reconstituted mice were analyzed 8 weeks after bone marrow transfer.

345  
346 **Cell staining.** For cleaved caspase 3 staining [28], homogenized mice thymocyte cells were stained with anti-  
347 CCR7/CD197 at a final dilution of 1:50 for 30 min at 37°C prior to additional surface stains. Following surface  
348 staining, cells were fixed with Cytofix/Cytoperm (BD Biosciences) for 20 min at 4°C. Cells were then washed

349 with Perm/Wash buffer (BD Biosciences) twice. Cells were stained with anti–cleaved caspase 3 at a 1:50  
350 dilution at 23°C for 30 min.

351 For iNKT staining, Biotinylated PBS-57 loaded or unloaded monomers were obtained from the Tetramer  
352 Core Facility of the National Institutes of Health and tetramerized with PE-labeled streptavidin from ProZyme.  
353 Hepatic lymphocytes were resuspended in 100 µl of sorter buffer (PBS with 2% FCS, 1 mM EDTA, and 0.1%  
354 sodium azide) and stained with PE-iNKT tetramers at a final dilution of 1:200 at 23°C for 30 min.

355 For transcription factor staining, cells were incubated with surface antibody at 4°C for 20 min, permeabilized  
356 at 4°C for 30 min, and then stained with anti–Foxp3 at 23°C for 30 min using a Foxp3/Transcription  
357 transcription factor buffer set (Invitrogen, ThermoFisher Scientific). Samples were acquired with BD  
358 FACSCelesta (BD Biosciences), and data were analyzed with FlowJo (version 10.7.1).

359  
360 **Statistical testing.** GraphPad Prism was used for all statistical analyses. A nonparametric Mann-Whitney U test  
361 or one-way ANOVA was used for estimation of statistical significance. Data is shown as mean ± SEM.

362 \*p<0.05, \*\*p<0.01, \*\*\*p<0.001, \*\*\*\*p<0.0001.



## 363 **Figure Legends**

### 364 **Figure 1. Generation of Fam49a-KO and Fam49b-KO mice with CRISPR/Cas9 and expression of** 365 **Fam49a and Fam49b in mice.**

366 (A) Schematic diagram depicting the locations of guide RNAs (gRNAs) targeting the Fam49a.

367 (B) Schematic diagram depicting the locations of guide RNAs (gRNAs) targeting the Fam49b.

368 (C) Immunoblot analysis of Fam49a and Fam49b expression in spleen from WT, Fam49a-KO mice, and  
369 Fam49b-KO mice. The data are representative of three independent experiments. See also Figure 1 - source data  
370 1.

371 (D) Immunoblot analysis of Fam49a and Fam49b expression in lymph nodes, thymus, and peripheral CD4 T  
372 cells, and peripheral CD8 T cells from WT mice. The data are representative of three independent experiments.  
373 See also Figure 1 - source data 1.

### 374 **Figure 2. Reduced T cell numbers in Fam49b-KO mice, but not Fam49a-KO mice.**

375 (A) Flow cytometry profiles of the expression of CD4 and CD8 (**left**) and absolute number of lymphocytes in  
376 peripheral lymph nodes (**right**) from WT, Fam49a-KO, and Fam49b-KO mice. Numbers adjust to outlined  
377 areas indicate percentage of T cells among total lymphocytes. Each dot represents an individual mouse. Small  
378 horizontal lines indicate the mean of 8 mice. \*\*\*\*p<0.0001 (One-way ANOVA). Data are representative of four  
379 experiments. See also Figure 2 - source data 2.

380 (B) Ratio of CD4 T cells over CD8 T cells in spleen, peripheral lymph nodes, and mesenteric lymph node in  
381 WT, Fam49a-KO, and Fam49b-KO mice. Each dot represents an individual mouse. Small horizontal lines  
382 indicate the mean of 8 mice. \*\*\*\*p<0.0001 (One-way ANOVA). Data are representative of four experiments.  
383 See also Figure 2 - source data 2.

384 (C) Expression of CD44 and CD62L on T cells (**left**) and absolute number of T cell subset (**right**) in peripheral  
385 lymph nodes in CD4 T cells (**upper**) and CD8 T cells (**lower**) from WT, Fam49a-KO, and Fam49b-KO mice.  
386 CD4<sup>+</sup> T subset with phenotype of naïve (CD62L<sup>+</sup>CD44<sup>lo</sup>), effector (CD62L<sup>-</sup>CD44<sup>lo</sup>), and memory (CD62L<sup>-</sup>  
387 CD44<sup>hi</sup>) cells. CD8<sup>+</sup> T subset with phenotype of naïve (CD62L<sup>+</sup>CD44<sup>lo</sup>), acute effector (CD62L<sup>-</sup>CD44<sup>lo</sup>),  
388 effector memory (CD62L<sup>-</sup>CD44<sup>hi</sup>), and central memory (CD62L<sup>+</sup>CD44<sup>hi</sup>). Numbers adjust to outlined areas  
389 indicate percentage of T cells subset among total T cells. Each dot represents an individual mouse. Small  
390

391 horizontal lines indicate the mean of 8 mice. \*\*\*\* $p < 0.0001$  (One-way ANOVA). Data are representative of four  
392 experiments. See also Figure 2 - source data 2.

393 **(D)** Flow cytometry analyzing the expression of CD4 and CD8 in thymocytes. Contour plots show percentage  
394 of CD8 SP and CD4 SP in total thymocytes (**upper**). Absolute number of total thymocytes (**lower left**),  
395 Percentage of CD4 SP and CD8 SP in total thymocytes (**lower middle**), and ratio of CD4 SP cells over CD8 SP  
396 cells was shown (**lower right**). Each dot represents an individual mouse. Small horizontal lines indicate the  
397 mean of 12 mice. \* $p = 0.0295$  and \*\*\*\* $p < 0.0001$  (Mann-Whitney test). Data are representative of five  
398 experiments. See also Figure 2 - source data 2.

### 400 **Figure 3. Defective thymic development in Fam49b-KO mice**

401 **(A)** Expression of TCR $\beta$  and B220 expressing cells (**left**) and frequency of TCR $\beta$  expressing cells among  
402 CD45.2<sup>+</sup> total lymph node cells from bone marrow chimera mice (**right**). Bone marrow from either WT or  
403 Fam49b-KO mice was injected *i.v.* into lethally irradiated CD45.1<sup>+</sup> WT mice and chimeric mice were analyzed  
404 8 weeks later. Small horizontal lines indicate the mean of 7 mice. \*\* $p = 0.0047$  (Mann-Whitney test). Data are  
405 pooled from two independent experiments. See also Figure 3 - source data 3.

406 **(B)** Ratio of CD4 T cells over CD8 T cells in CD45.2<sup>+</sup> total lymph node cells from bone marrow chimera mice.  
407 Bone marrow from either WT or Fam49b-KO mice was injected *i.v.* into lethally irradiated CD45.1<sup>+</sup> WT mice  
408 and chimeric mice were analyzed 8 weeks later. Small horizontal lines indicate the mean of 7 mice. \* $p = 0.0192$   
409 (Mann-Whitney test). Data are pooled from two independent experiments. See also Figure 3 - source data 3.

410 **(C)** (**left**) Differential surface expression of CD69 and TCR $\beta$  was used to identify thymocyte population of  
411 different maturity in WT and Fam49b-KO mice. (**right**) Dot Plots show percentages of different thymocyte  
412 subpopulations in WT and Fam49b-KO mice. Numbers adjust to outlined areas indicate percentage of  
413 thymocytes subset among total thymocytes. Floating bars (min to max). horizontal lines indicate the mean of 12  
414 mice. \*\* $p = 0.0038$  and \*\*\* $p = 0.0003$  and \*\*\* $p = 0.0001$  (Mann-Whitney test). Data are representative of five  
415 experiments. See also Figure 3 - source data 3.

416 **(D)** Ratio of CD4 SP cells over CD8 SP cells in TCR $\beta^{\text{hi}}$ CD69<sup>-</sup> thymocyte subpopulation. horizontal lines  
417 indicate the mean of 12 mice. \*\*\*\* $p < 0.0001$  (Mann-Whitney test). Data are representative of five experiments.  
418 See also Figure 3 - source data 3.

419 **(E)** (**left**) Differential surface expression of CD5 and TCR $\beta$  was used to identify thymocyte population of  
420 different maturity in WT and Fam49b-KO mice. (**right**) Dot Plots show percentages of different thymocyte  
421 subpopulations from mice. Numbers adjust to outlined areas indicate percentage of thymocytes subset among  
422 total thymocytes. Floating bars (min to max). Horizontal lines indicate the mean of 12 mice. \*\*\* $p = 0.0005$  and

423 \*\*\*p=0.0002 and \*\*\*\*p<0.0001 (Mann-Whitney test). Data are representative of five experiments. See also  
424 Figure 3 - source data 3.

425 (F) Ratio of CD4 SP cells over CD8 SP cells in TCR $\beta^{\text{hi}}$ CD5 $^{\text{hi}}$  thymocyte subpopulation. Small horizontal lines  
426 indicate the mean of 12 mice. \*\*\*\*p<0.0001 (Mann-Whitney test). Data are representative of five experiments.  
427 See also Figure 3 - source data 3.

428 (G) Frequency of TCR $\beta^{\text{hi}}$ CD24 $^{\text{low}}$  thymocyte subpopulation among total live thymocytes. Small horizontal lines  
429 indicate the mean of 12 mice. \*\*\*\*p<0.0001 (Mann-Whitney test). Data are representative of five experiments.  
430 See also Figure 3 - source data 3.

#### 431 **Figure 4. Enhanced negative selection due to elevated TCR signaling in Fam49b-KO thymocytes**

432 (A) Frequency of cleaved caspase 3 $^+$  cells among TCR $\beta^{\text{hi}}$ CD5 $^{\text{hi}}$  (Signaled, **upper left**) and TCR $\beta^-$ CD5 $^-$  (Non-  
433 signaled, **lower left**) thymocytes. Frequency of CCR7 $^+$  cleaved caspase 3 $^+$  and CCR7 $^-$  cleaved caspase 3 $^+$  cells  
434 among TCR $\beta^{\text{hi}}$ CD5 $^{\text{hi}}$  (Signaled, **upper right**) and TCR $\beta^-$ CD5 $^-$  (Non-signaled, **lower right**) thymocytes. Small  
435 horizontal lines indicate the mean of 21 mice. \*\*p=0.0017 and \*\*\*\*p<0.0001 (Mann-Whitney test). Data are  
436 pooled from three independent experiments. See also Figure 4 - source data 4.

437 (B) Expression of activation marker CD5 on DP, CD4 SP, and CD8 SP thymocytes from WT and Fam49b-KO  
438 mice. (**upper**). Geometric MFI of CD5 on DP thymocytes (**upper right**). Expression of activation marker  
439 CD69 on DP, CD4 SP, and CD8 SP thymocytes from WT and Fam49b-KO mice (**lower**). Geometric MFI of  
440 CD69 on DP thymocytes (**lower right**). Small horizontal lines indicate the mean of 6 mice. \*\*p=0.0022 (Mann-  
441 Whitney test). Data are representative of seven experiments. See also Figure 4 - source data 4.

442 (C) Peripheral CD4 $^+$ CD25 $^-$  T cells (**left**) or CD8 $^+$  T cells (**right**) were activated by immobilized anti-CD3 $\epsilon$  (1,  
443 2, 4  $\mu\text{g}/\text{mL}$ ) for 3 days, after which IL-2 in the supernatant was analyzed. Data are representative of four  
444 experiments. See also Figure 4 - source data 4.

#### 445 **Figure 5. Fam49b-KO mice have lower frequency of CD8 $\alpha^+$ TCR $\alpha\beta^+$ and TCR $\gamma\delta^+$ IELs T cells than WT mice**

446 (A) Flow cytometry analysis of CD8 $\alpha^+$  TCR $\beta^+$  IELs T cells (**top**), CD1d-tetramer $^+$  iNKT cells in the liver  
447 (**middle**), and Foxp3 $^+$ CD25 $^+$  lymphoid regulatory T cells in the peripheral lymph nodes (**bottom**) from WT and  
448 Fam49b-KO mice. Right panels show average frequencies of each population among total lymphocytes or CD4  
449 T cells. \*\*\*p=0.0003 and \*\*\*\*p<0.0001 (Mann-Whitney test). Data are pooled from seven independent  
450 experiments (CD8 $\alpha^+$  TCR $\beta^+$  IELs; mean and s.e.m, n=12~13), representative of four experiments (iNKT cells;  
451  
452  
453

454 mean and s.e.m, n=6), or representative from seven independent experiments (Treg; mean and s.e.m, n=8). See  
455 also Figure 5 - source data 5.

456 **(B)** Frequency of TCR $\gamma\delta^+$  IELs T cells, CD8 $\alpha\alpha^+$ TCR $\alpha\beta^+$  IELs T cells, and CD8 $\alpha\beta^+$ TCR $\beta^+$  IELs T cells among  
457 total live IELs cells in WT and Fam49b-KO mice. Each dot represents an individual mouse. Small horizontal  
458 lines indicate the mean of 12-13 mice. \*\*\*\*p<0.0001 (Mann-Whitney test). Data are pooled from seven  
459 independent experiments. See also Figure 5 - source data 5.

460 **(C)** Frequency of CD5 $^+$  T cells and CD5 $^-$  T cells among total CD3 $\epsilon^+$  IELs T cells in WT and Fam49b-KO mice.  
461 . Each dot represents an individual mouse. Small horizontal lines indicate the mean of 8 mice. \*\*\*p=0.0002  
462 (Mann-Whitney test). Data are pooled from six independent experiments. See also Figure 5 - source data 5.  
463

464 **Supplementary Fig. 1 Fam49b expression in thymocyte subsets and T cells from WT mice.**

465 (A) Fam49b mRNA expression analyzed by real-time RT-PCR of FACS-sorted subset of WT thymocytes and  
466 peripheral T cells. Data shown relative to  $\beta$  actin expression. Error bars denote s.e.m. Data are pooled from two  
467 independent experiments. See also Supplementary Figure 1 - source data 6.

468 **Supplementary Fig. 2 Analyzing thymic selection using TCR $\beta$  and CD69 expression in thymus.**

469 Representative flow cytometry plot showing TCR $\beta$  and CD69 expression (**left**) in total thymocytes from WT,  
470 Fam49a-KO, and Fam49b-KO mice. Numbers indicate percentage of CD4 SP or CD8 SP (**right**) from TCR $\beta$  by  
471 CD69 profile gated (**left**). Data are representative of five experiments.

472 **Supplementary Fig. 3 Analyzing thymic selection using TCR $\beta$  and CD5 expression in thymus.**

473 Representative flow cytometry plot showing TCR $\beta$  and CD5 expression (**left**) in total thymocytes from WT,  
474 Fam49a-KO, and Fam49b-KO mice. Numbers indicate percentage of CD4 SP or CD8 SP (**right**) from TCR $\beta$  by  
475 CD5 profile gated (**left**). The Data are representative of five experiments.

476 **Supplementary Fig. 4 Flow cytometry gating strategies to measure clonal deletion and death by neglect.**

477 Signaled and Non-signaled thymocytes identified by TCR $\beta$  and CD5 expression, excluding B220<sup>+</sup>, NK1.1<sup>+</sup>,  
478 TCR $\gamma\delta$ <sup>+</sup>, CD11b<sup>+</sup>, Ly-6C<sup>+</sup>, Ly-6G<sup>+</sup>, CD25<sup>+</sup> (Dump) cells. Clonal deletion and death by neglect identified by  
479 intracellular Cleaved Caspase 3 and anatomic location identified by CCR7. Numbers indicate percentage of  
480 cells in each.

481 **Supplementary Fig. 5. *In vitro* T cell proliferation following  $\alpha$ -CD3 $\epsilon$  stimulation.**

482 Peripheral CD4<sup>+</sup>CD25<sup>-</sup> T cells (**left**) or CD8<sup>+</sup> T cells (**right**) were labeled with CellTrace Violet (5  $\mu$ M, room  
483 temperature, 10 min) and stimulated by 4  $\mu$ g/mL of immobilized anti-CD3 $\epsilon$  for 3 days. CellTrace Violet  
484 dilution was analyzed by flow cytometry. Data are representative of four experiments.

485 **Supplementary Fig. 6 Total number of Treg cells in lymph nodes, and minor IELs T subsets.**

486 (A) Total number of Foxp3<sup>+</sup> regulatory T cells in peripheral lymph nodes from WT and Fam49b-KO mice.  
487 Each dot represents an individual mouse. Small horizontal lines indicate the mean of 7-8 mice. \*\*p=0.0012  
488 (Mann-Whitney test). Data are representative from seven independent experiments. See also Supplementary  
489 Figure 6 - source data 7.

490 (B) Frequency of CD4<sup>+</sup>TCR $\alpha\beta$ <sup>+</sup> IELs, CD4<sup>+</sup>CD8 $\alpha$ <sup>+</sup>TCR $\alpha\beta$  IELs, and CD4<sup>-</sup>CD8 $\alpha$ <sup>-</sup>TCR $\alpha\beta$  IELs T among total  
491 live IELs T cells in WT and Fam49b-KO mice. Each dot represents an individual mouse. Small horizontal lines

497 indicate the mean of 12 mice. \*p=0.0235 and \*\*p=0.0025 and \*\*\*\*p<0.0001 (Mann-Whitney test). Data are  
498 pooled from six independent experiments See also Supplementary Figure 6 - source data 7.  
499

| <b>Source data</b>                     |                                                     |
|----------------------------------------|-----------------------------------------------------|
| <b>Label</b>                           | <b>Title</b>                                        |
| Figure 1 – source data 1               | Original and labeled files for western blot images. |
| Figure 2 – source data 2               | Raw data for Figure 2                               |
| Figure 3 – source data 3               | Raw data for Figure 3                               |
| Figure 4 – source data 4               | Raw data for Figure 4                               |
| Figure 5 – source data 5               | Raw data for Figure 5                               |
| Supplementary Figure 1 – source data 6 | Raw data for Supplementary Figure 1                 |
| Supplementary Figure 6 – source data 7 | Raw data for Supplementary Figure 6                 |

500

501 **Acknowledgments**

502 We thank Dr. J David Peske for editorial comments. Dr. Nilabh Shastri passed away in 2021. May he rest in  
503 peace. This work was supported by NIH grant (R01AI130210, R01AI121174, R37AI060040).

504

505

506 **Competing interests**

507 The authors declare no potential conflicts of interest.

## References

1. Xu, X., et al., *Maturation and emigration of single-positive thymocytes*. Clin Dev Immunol, 2013. **2013**: p. 282870.
2. Hogquist, K.A., *Signal strength in thymic selection and lineage commitment*. Curr Opin Immunol, 2001. **13**(2): p. 225-31.
3. Gascoigne, N.R., et al., *TCR Signal Strength and T Cell Development*. Annu Rev Cell Dev Biol, 2016. **32**: p. 327-348.
4. Klein, L., et al., *Positive and negative selection of the T cell repertoire: what thymocytes see (and don't see)*. Nat Rev Immunol, 2014. **14**(6): p. 377-91.
5. Hernández-Hoyos, G., et al., *Lck activity controls CD4/CD8 T cell lineage commitment*. Immunity, 2000. **12**(3): p. 313-22.
6. Kappes, D.J., X. He, and X. He, *CD4-CD8 lineage commitment: an inside view*. Nat Immunol, 2005. **6**(8): p. 761-6.
7. Baldwin, T.A., K.A. Hogquist, and S.C. Jameson, *The fourth way? Harnessing aggressive tendencies in the thymus*. J Immunol, 2004. **173**(11): p. 6515-20.
8. Stritesky, G.L., S.C. Jameson, and K.A. Hogquist, *Selection of self-reactive T cells in the thymus*. Annu Rev Immunol, 2012. **30**: p. 95-114.
9. Lambolez, F., M. Kronenberg, and H. Cheroutre, *Thymic differentiation of TCR alpha beta(+) CD8 alpha alpha(+) IELs*. Immunol Rev, 2007. **215**: p. 178-88.
10. Kronenberg, M. and L. Gapin, *The unconventional lifestyle of NKT cells*. Nat Rev Immunol, 2002. **2**(8): p. 557-68.
11. Hsieh, C.S., H.M. Lee, and C.W. Lio, *Selection of regulatory T cells in the thymus*. Nat Rev Immunol, 2012. **12**(3): p. 157-67.
12. Burkhardt, J.K., E. Carrizosa, and M.H. Shaffer, *The actin cytoskeleton in T cell activation*. Annu Rev Immunol, 2008. **26**: p. 233-59.
13. Kumari, S., et al., *T cell antigen receptor activation and actin cytoskeleton remodeling*. Biochim Biophys Acta, 2014. **1838**(2): p. 546-56.
14. Billadeau, D.D., J.C. Nolz, and T.S. Gomez, *Regulation of T-cell activation by the cytoskeleton*. Nat Rev Immunol, 2007. **7**(2): p. 131-43.
15. Kaizuka, Y., et al., *Mechanisms for segregating T cell receptor and adhesion molecules during immunological synapse formation in Jurkat T cells*. Proc Natl Acad Sci U S A, 2007. **104**(51): p. 20296-301.
16. Babich, A., et al., *F-actin polymerization and retrograde flow drive sustained PLC $\gamma$ 1 signaling during T cell activation*. J Cell Biol, 2012. **197**(6): p. 775-87.
17. Babich, A. and J.K. Burkhardt, *Coordinate control of cytoskeletal remodeling and calcium mobilization during T-cell activation*. Immunol Rev, 2013. **256**(1): p. 80-94.
18. Tybulewicz, V.L. and R.B. Henderson, *Rho family GTPases and their regulators in lymphocytes*. Nat Rev Immunol, 2009. **9**(9): p. 630-44.
19. Turner, M., et al., *A requirement for the Rho-family GTP exchange factor Vav in positive and negative selection of thymocytes*. Immunity, 1997. **7**(4): p. 451-60.
20. Fischer, K.D., et al., *Defective T-cell receptor signalling and positive selection of Vav-deficient CD4+ CD8+ thymocytes*. Nature, 1995. **374**(6521): p. 474-7.
21. Zhang, R., et al., *Defective signalling through the T- and B-cell antigen receptors in lymphoid cells lacking the vav proto-oncogene*. Nature, 1995. **374**(6521): p. 470-3.
22. Dumont, C., et al., *Rac GTPases play critical roles in early T-cell development*. Blood, 2009. **113**(17): p. 3990-8.



- 555 23. Guo, F., et al., *Rac GTPase isoforms Rac1 and Rac2 play a redundant and crucial role in T-cell*  
556 *development*. Blood, 2008. **112**(5): p. 1767-75.
- 557 24. Phee, H., et al., *Pak2 is required for actin cytoskeleton remodeling, TCR signaling, and normal*  
558 *thymocyte development and maturation*. Elife, 2014. **3**: p. e02270.
- 559 25. Shang, W., et al., *Genome-wide CRISPR screen identifies FAM49B as a key regulator of actin dynamics*  
560 *and T cell activation*. Proc Natl Acad Sci U S A, 2018. **115**(17): p. E4051-E4060.
- 561 26. Li, R.A., et al., *Ndr1b and fam49ab modulate the PTEN pathway to control T-cell lymphopoiesis in the*  
562 *zebrafish*. Blood, 2016. **128**(26): p. 3052-3060.
- 563 27. Hu, Q., et al., *Examination of thymic positive and negative selection by flow cytometry*. J Vis Exp,  
564 2012(68).
- 565 28. Breed, E.R., M. Watanabe, and K.A. Hogquist, *Measuring Thymic Clonal Deletion at the Population*  
566 *Level*. J Immunol, 2019. **202**(11): p. 3226-3233.
- 567 29. McCaughy, T.M., et al., *Clonal deletion of thymocytes can occur in the cortex with no involvement of*  
568 *the medulla*. J Exp Med, 2008. **205**(11): p. 2575-84.
- 569 30. Ueno, T., et al., *CCR7 signals are essential for cortex-medulla migration of developing thymocytes*. J  
570 Exp Med, 2004. **200**(4): p. 493-505.
- 571 31. Tarakhovsky, A., et al., *A role for CD5 in TCR-mediated signal transduction and thymocyte selection*.  
572 Science, 1995. **269**(5223): p. 535-7.
- 573 32. Azzam, H.S., et al., *CD5 expression is developmentally regulated by T cell receptor (TCR) signals and*  
574 *TCR avidity*. J Exp Med, 1998. **188**(12): p. 2301-11.
- 575 33. Oh-Hora, M., et al., *Agonist-selected T cell development requires strong T cell receptor signaling and*  
576 *store-operated calcium entry*. Immunity, 2013. **38**(5): p. 881-95.
- 577 34. Hogquist, K.A. and S.C. Jameson, *The self-obsession of T cells: how TCR signaling thresholds affect*  
578 *fate 'decisions' and effector function*. Nat Immunol, 2014. **15**(9): p. 815-23.
- 579 35. Cheroutre, H., F. Lambolez, and D. Mucida, *The light and dark sides of intestinal intraepithelial*  
580 *lymphocytes*. Nat Rev Immunol, 2011. **11**(7): p. 445-56.
- 581 36. Gaud, G., R. Lesourne, and P.E. Love, *Regulatory mechanisms in T cell receptor signalling*. Nat Rev  
582 Immunol, 2018. **18**(8): p. 485-497.
- 583 37. Hwang, J.R., et al., *Recent insights of T cell receptor-mediated signaling pathways for T cell activation*  
584 *and development*. Exp Mol Med, 2020. **52**(5): p. 750-761.
- 585 38. Stritesky, G.L., et al., *Murine thymic selection quantified using a unique method to capture deleted T*  
586 *cells*. Proc Natl Acad Sci U S A, 2013. **110**(12): p. 4679-84.
- 587 39. McDonald, B.D., et al., *Crossreactive  $\alpha\beta$  T Cell Receptors Are the Predominant Targets of Thymocyte*  
588 *Negative Selection*. Immunity, 2015. **43**(5): p. 859-69.
- 589 40. Fort, L., et al., *Fam49/CYRI interacts with Rac1 and locally suppresses protrusions*. Nat Cell Biol,  
590 2018. **20**(10): p. 1159-1171.
- 591 41. Yuki, K.E., et al., *CYRI/FAM49B negatively regulates RAC1-driven cytoskeletal remodelling and*  
592 *protects against bacterial infection*. Nat Microbiol, 2019. **4**(9): p. 1516-1531.
- 593 42. Saoudi, A., et al., *Rho-GTPases as key regulators of T lymphocyte biology*. Small GTPases, 2014. **5**.
- 594 43. Bosco, E.E., J.C. Mulloy, and Y. Zheng, *Rac1 GTPase: a "Rac" of all trades*. Cell Mol Life Sci, 2009.  
595 **66**(3): p. 370-4.
- 596 44. Guo, F., et al., *Rac GTPase isoforms Rac1 and Rac2 play a redundant and crucial role in T-cell*  
597 *development*. Blood, The Journal of the American Society of Hematology, 2008. **112**(5): p. 1767-1775.
- 598 45. Gomez, M., D. Kioussis, and D.A. Cantrell, *The GTPase Rac-1 controls cell fate in the thymus by*  
599 *diverting thymocytes from positive to negative selection*. Immunity, 2001. **15**(5): p. 703-13.
- 600 46. Melichar, H.J., et al., *Distinct temporal patterns of T cell receptor signaling during positive versus*  
601 *negative selection in situ*. Sci Signal, 2013. **6**(297): p. ra92.

- 602 47. Pobeziński, L.A., et al., *Clonal deletion and the fate of autoreactive thymocytes that survive negative*  
603 *selection*. Nat Immunol, 2012. **13**(6): p. 569-78.
- 604 48. Ruscher, R., et al., *CD8alphaalpha intraepithelial lymphocytes arise from two main thymic precursors*.  
605 Nat Immunol, 2017. **18**(7): p. 771-779.
- 606 49. Kurd, N.S., et al., *Factors that influence the thymic selection of CD8aa intraepithelial lymphocytes*.  
607 Mucosal Immunol, 2020.
- 608 50. Qiu, Z. and B.S. Sheridan, *Isolating Lymphocytes from the Mouse Small Intestinal Immune System*. J Vis  
609 Exp, 2018(132).  
610

Figure 1.

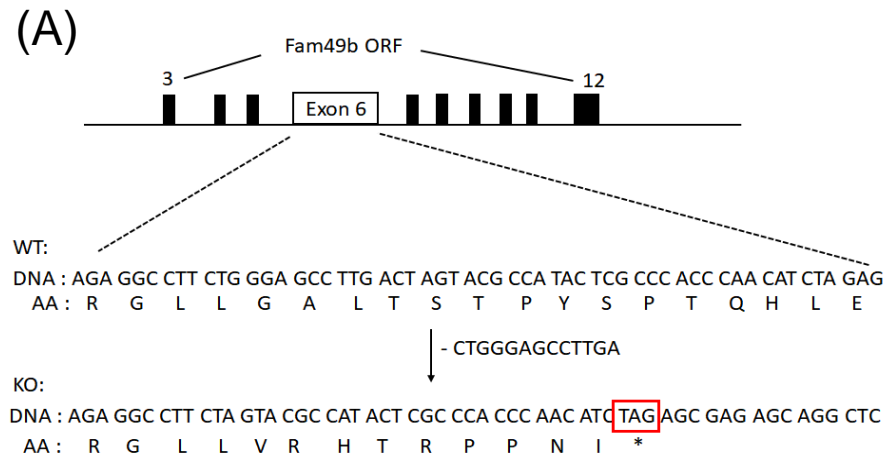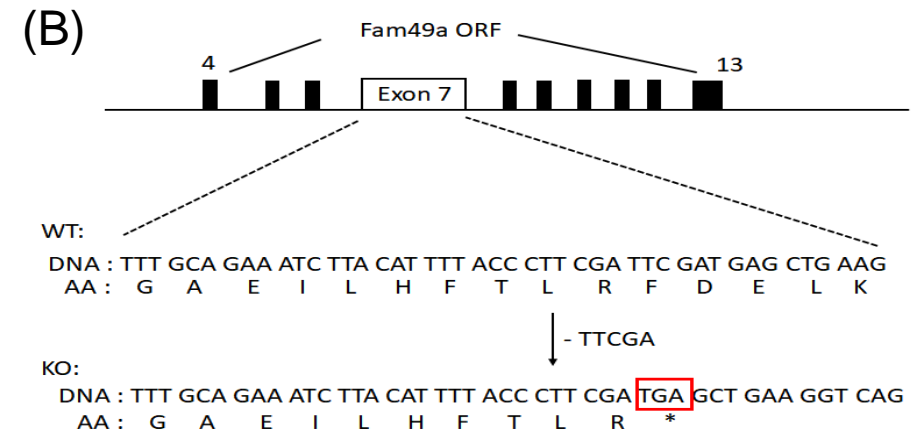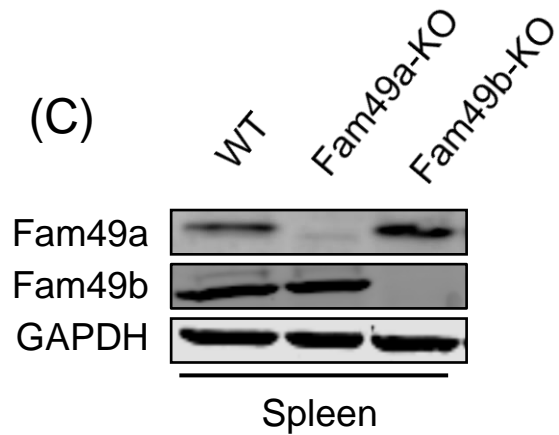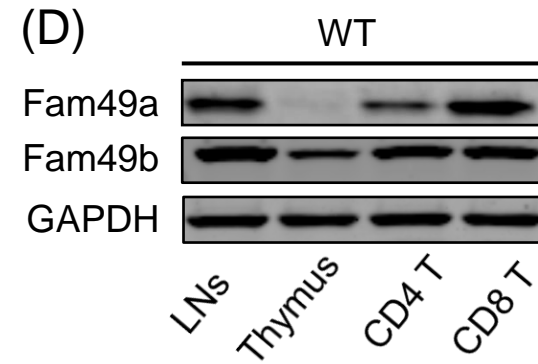

**Figure 2.**

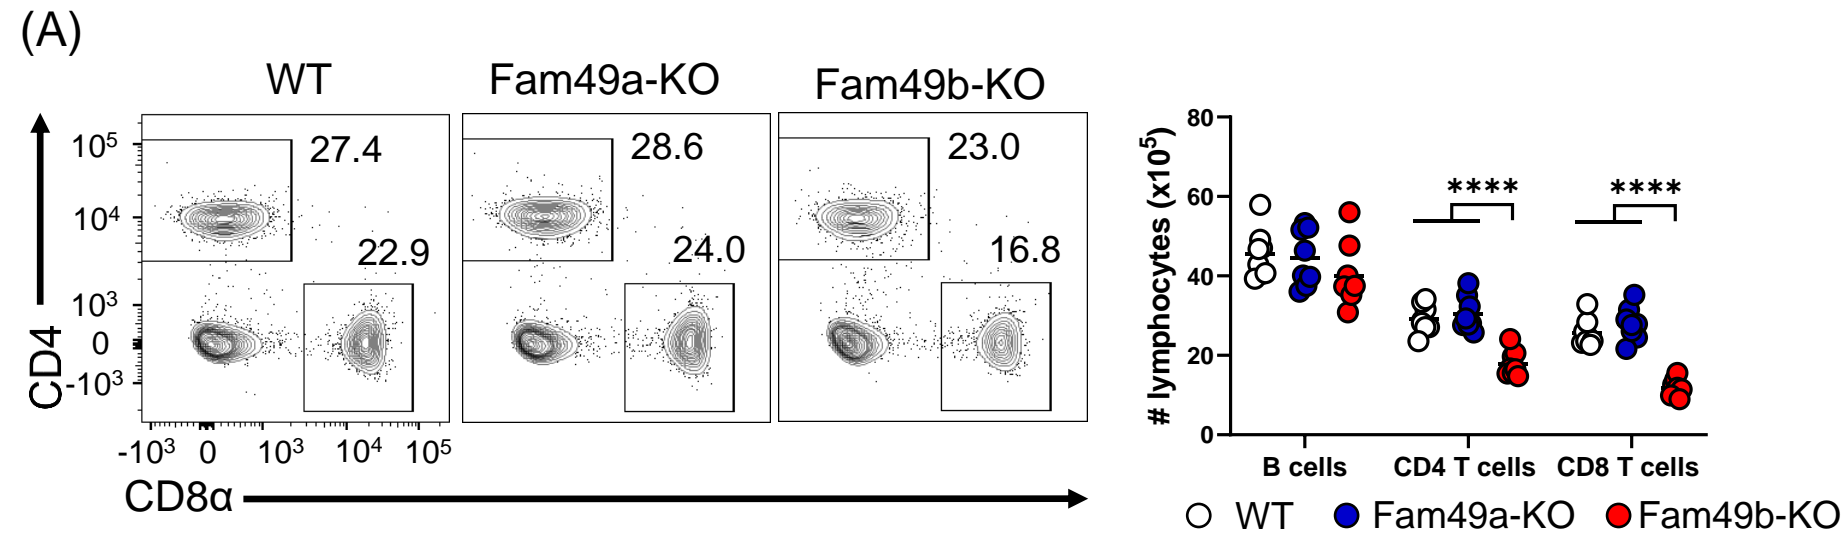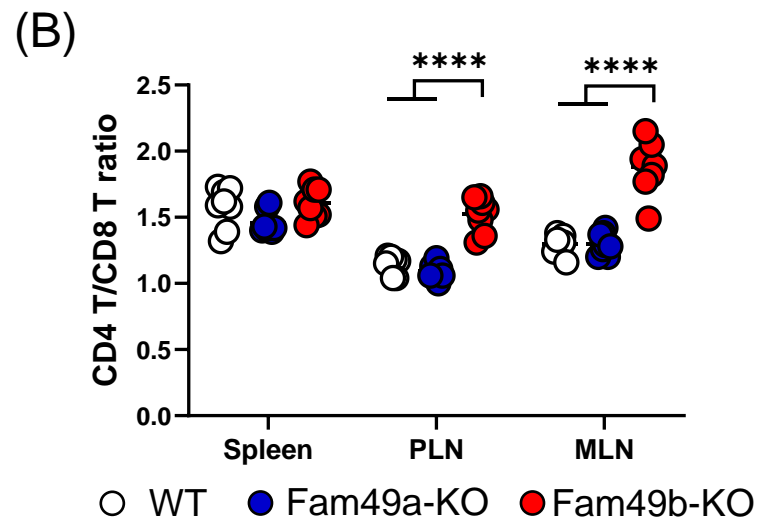

Figure 2.

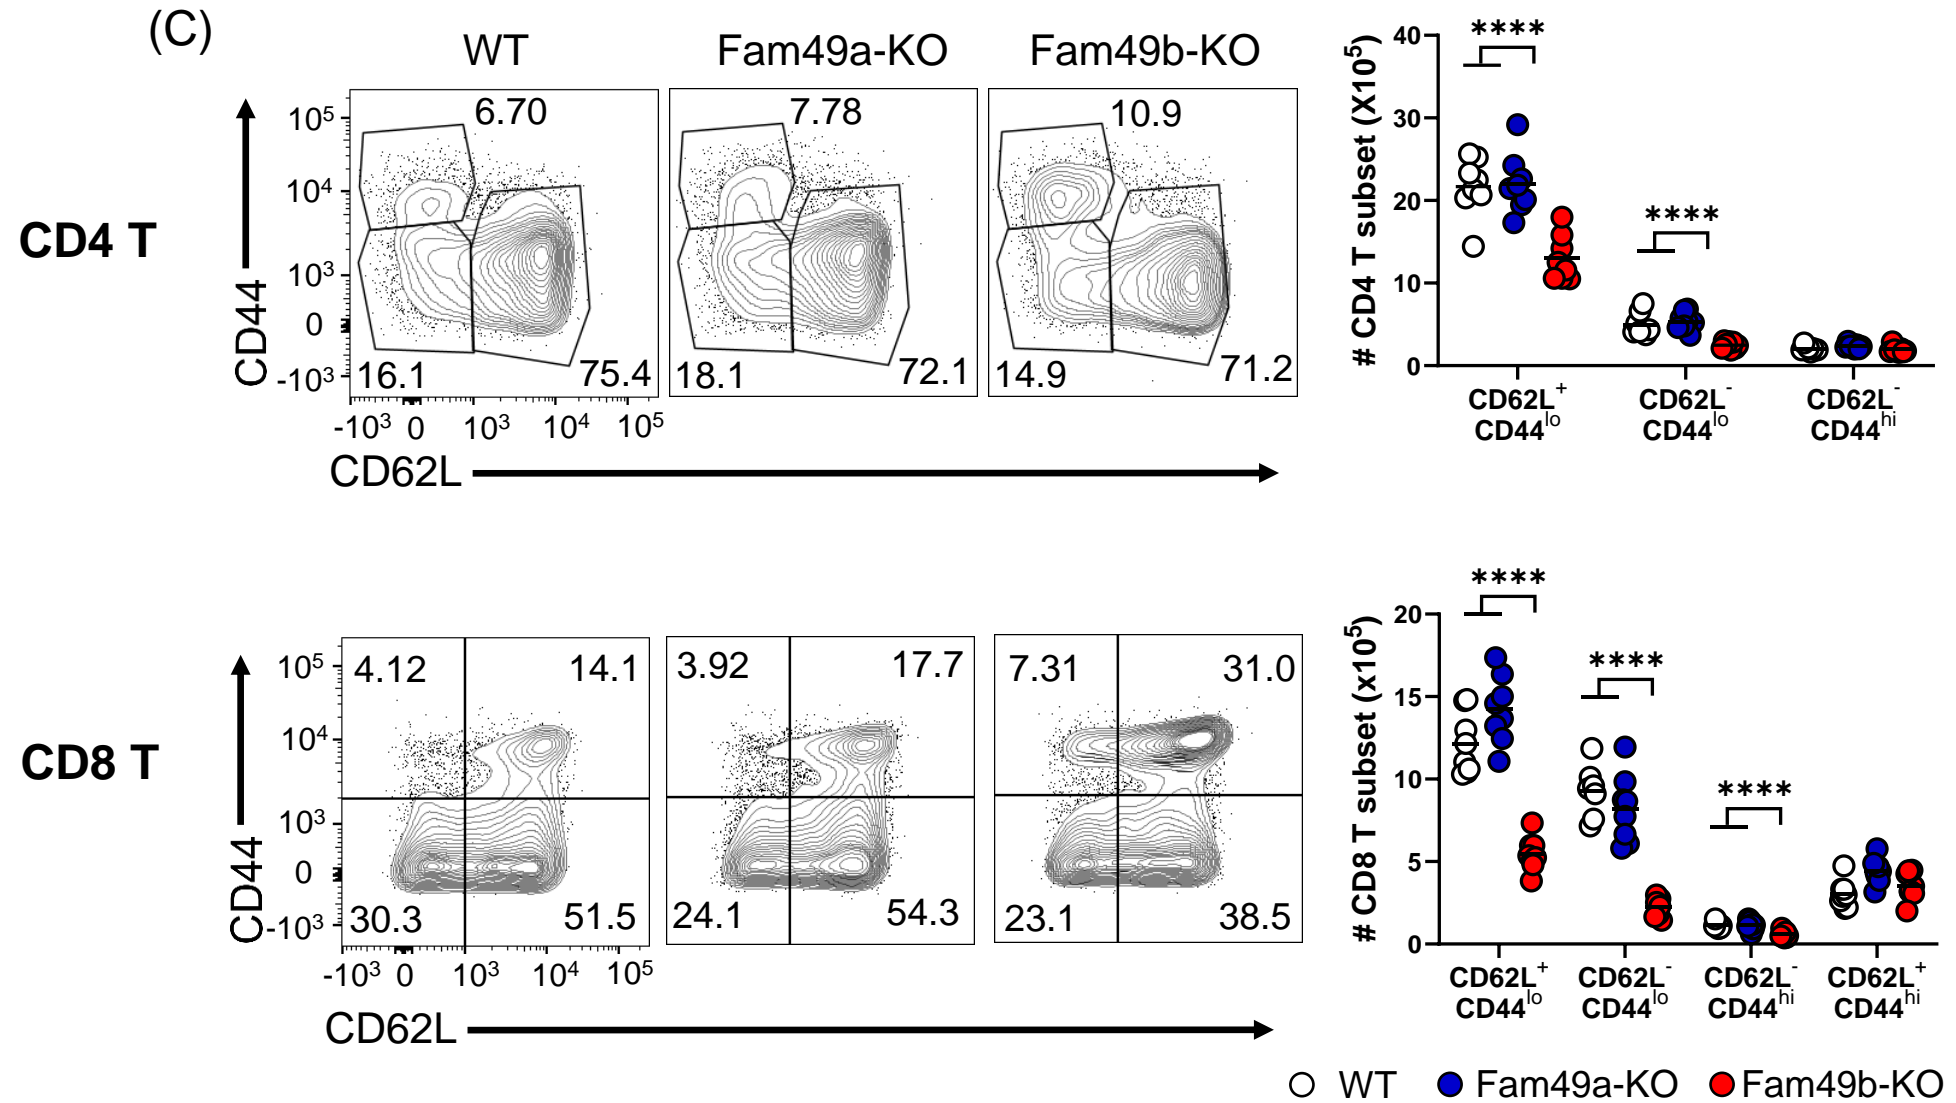

Figure 2.

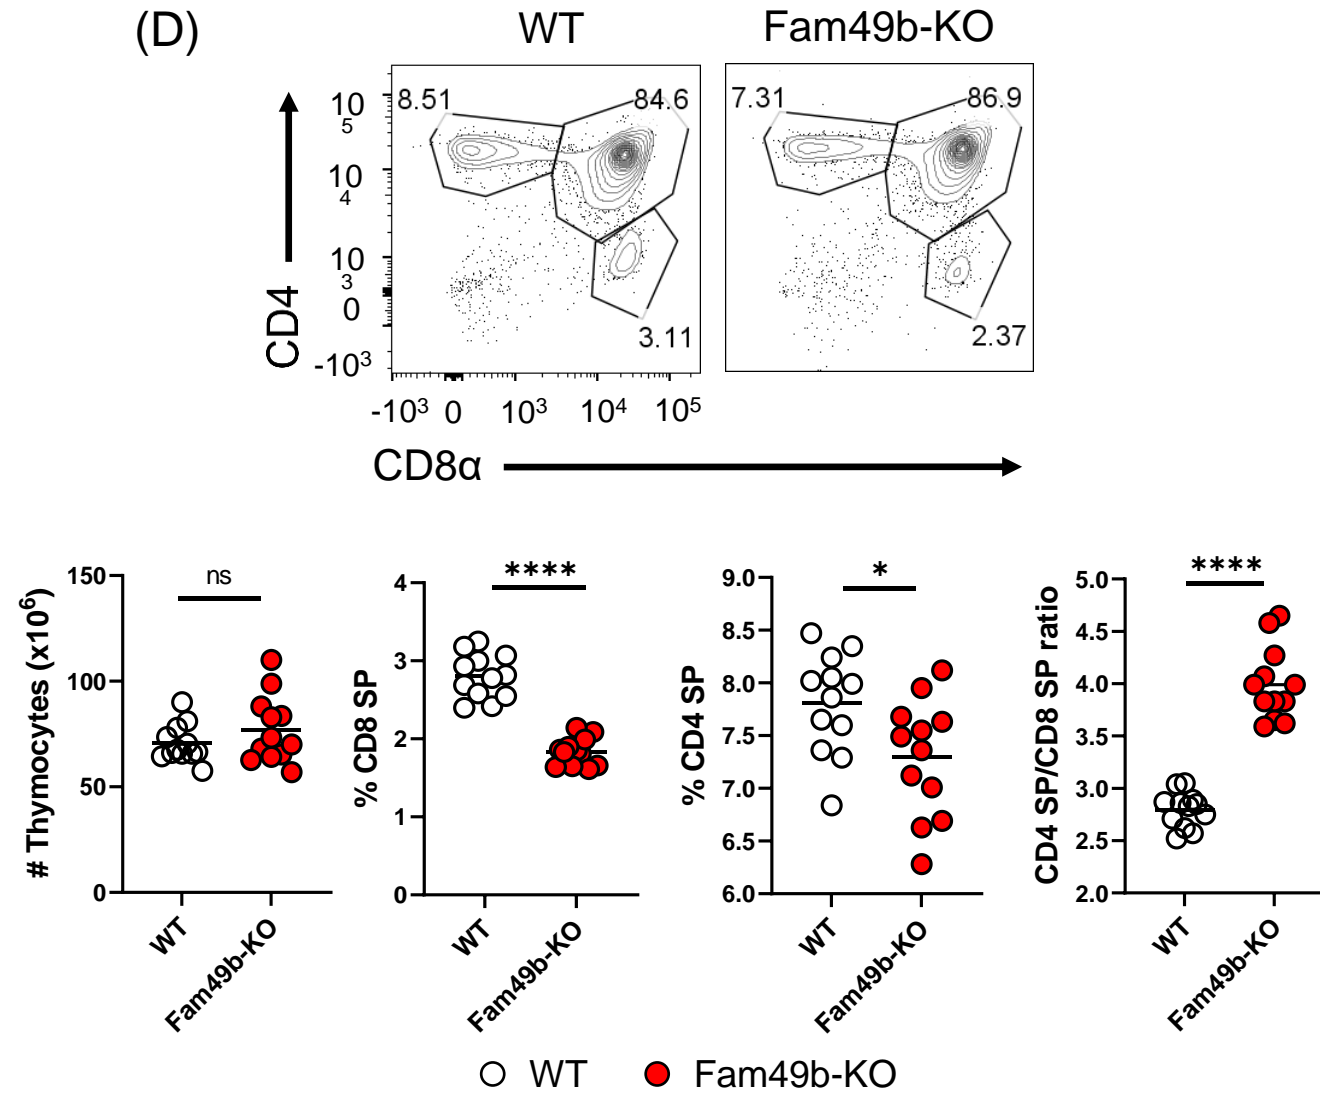

Figure 3.

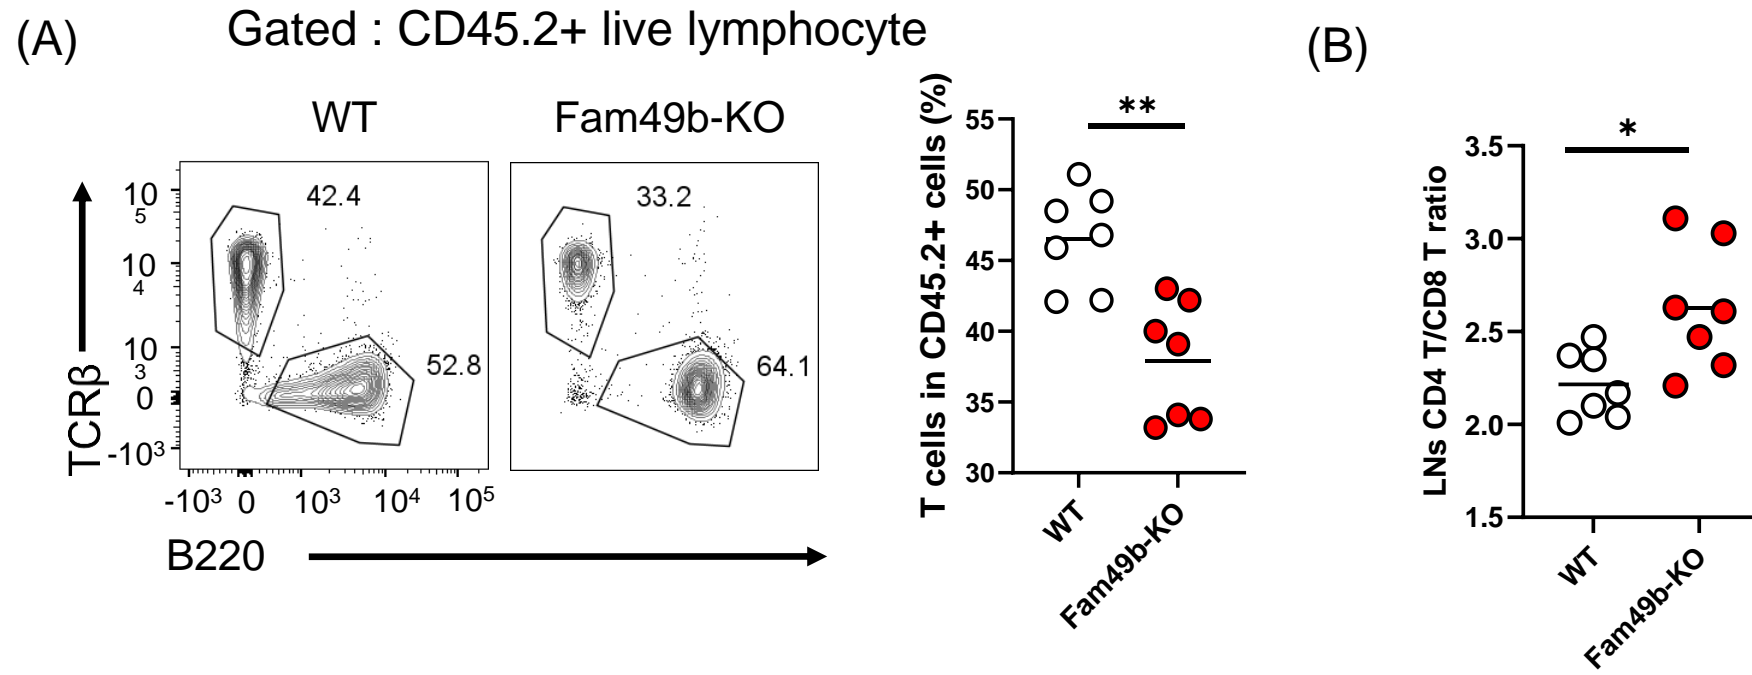

**Figure 3.**

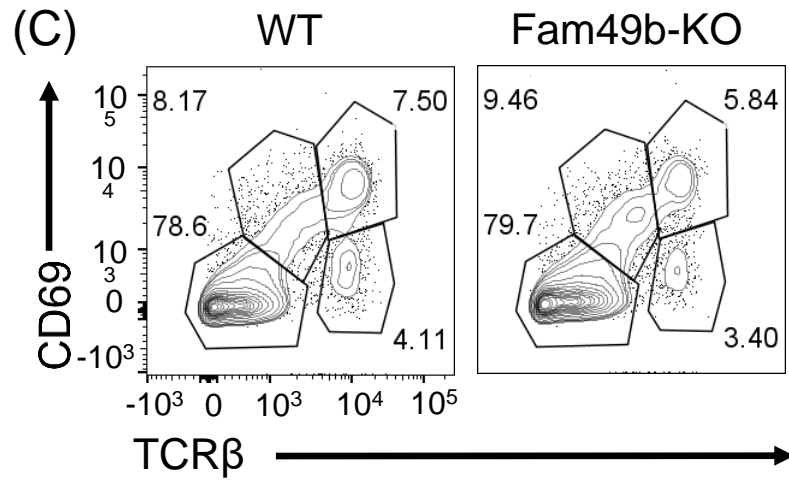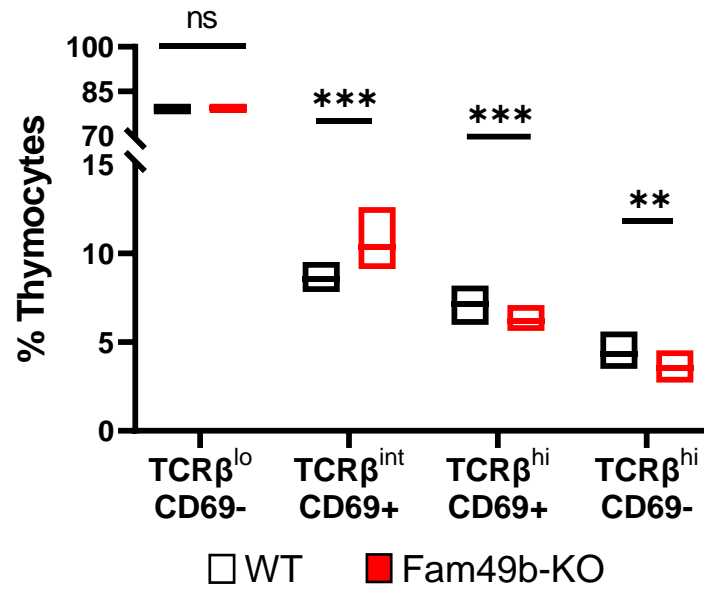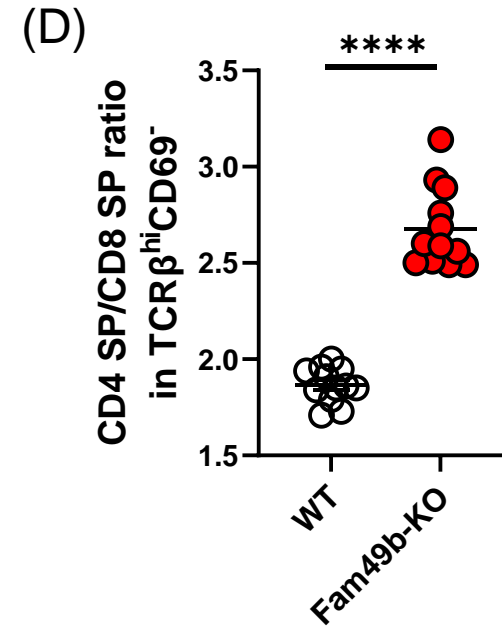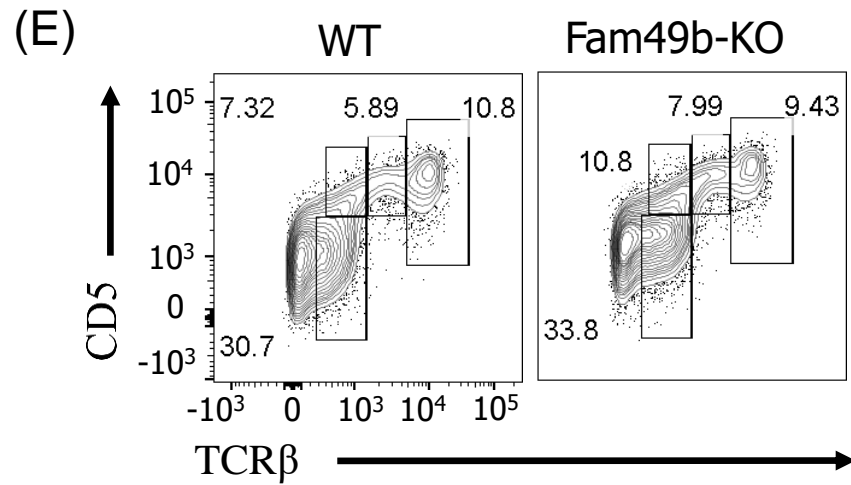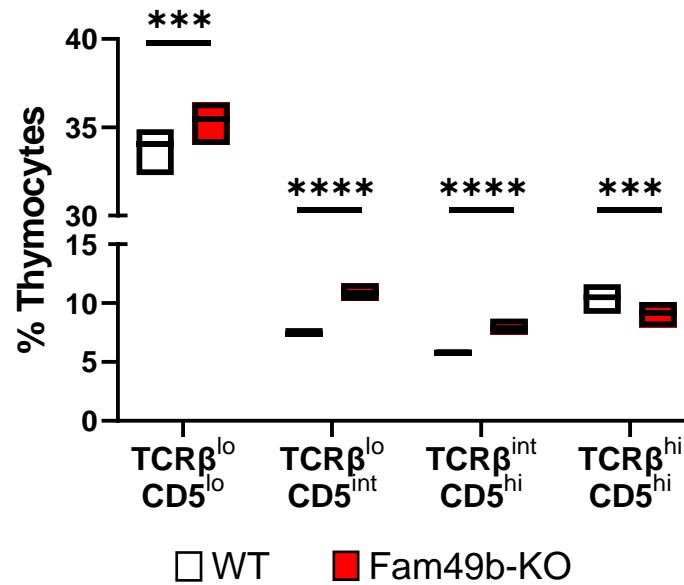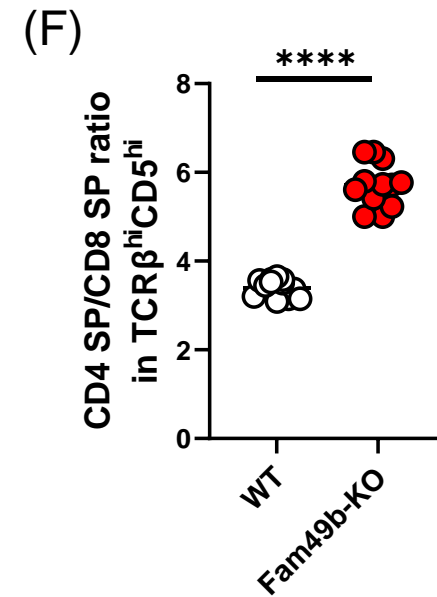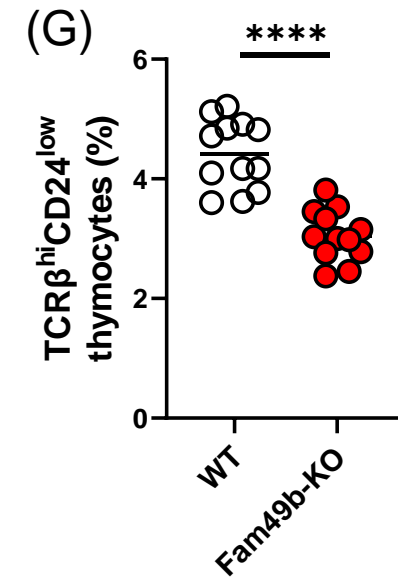



Figure 4.

(A)

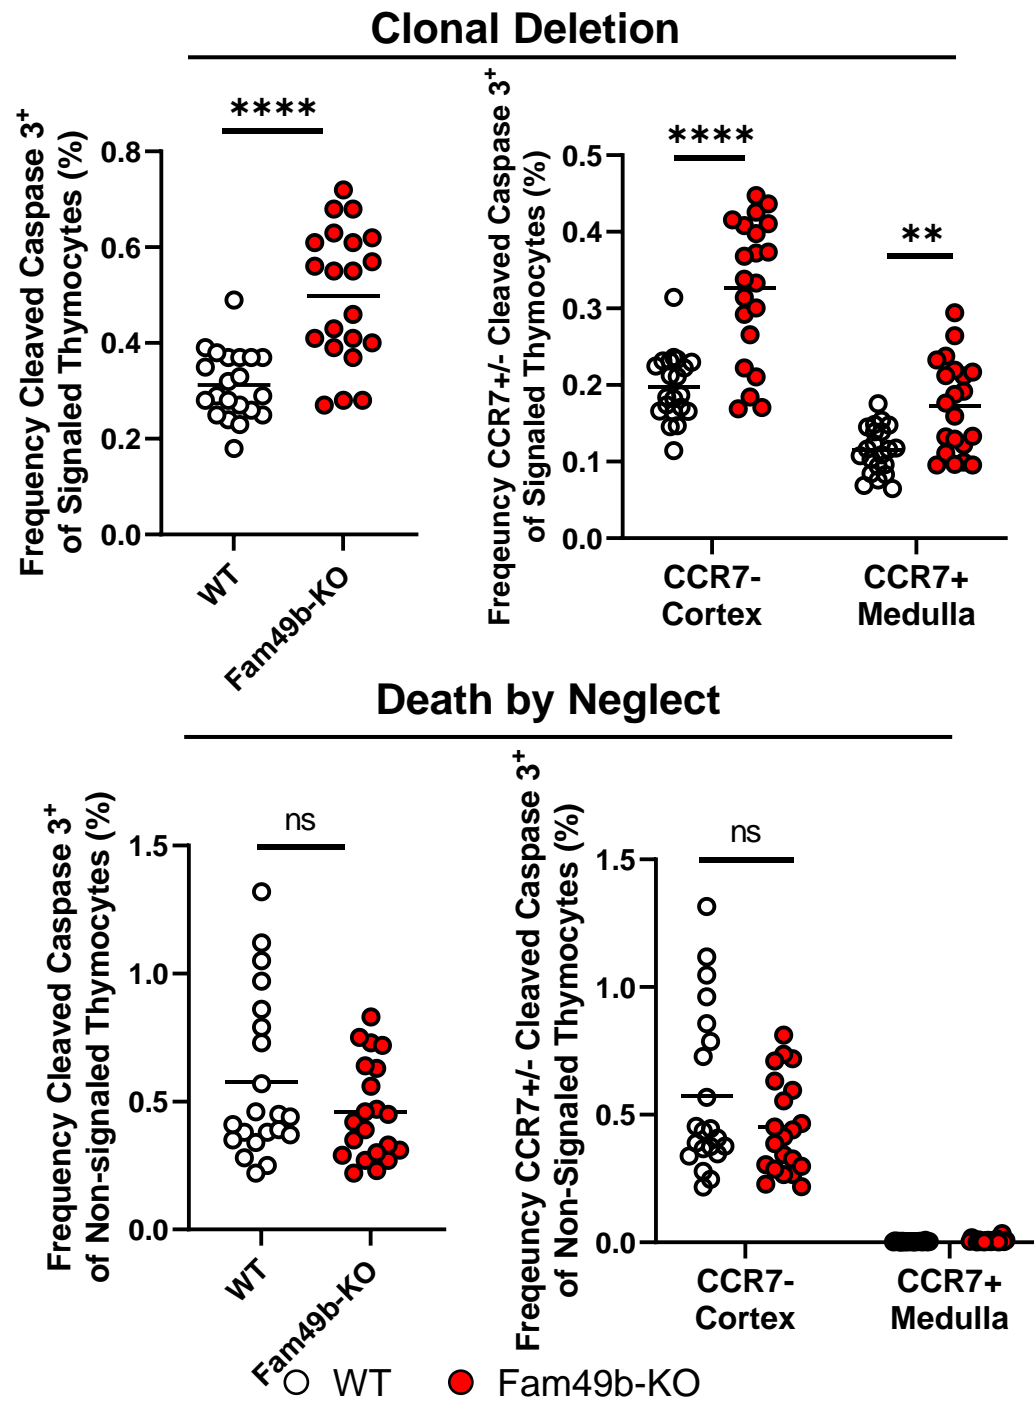

**Figure 4.**

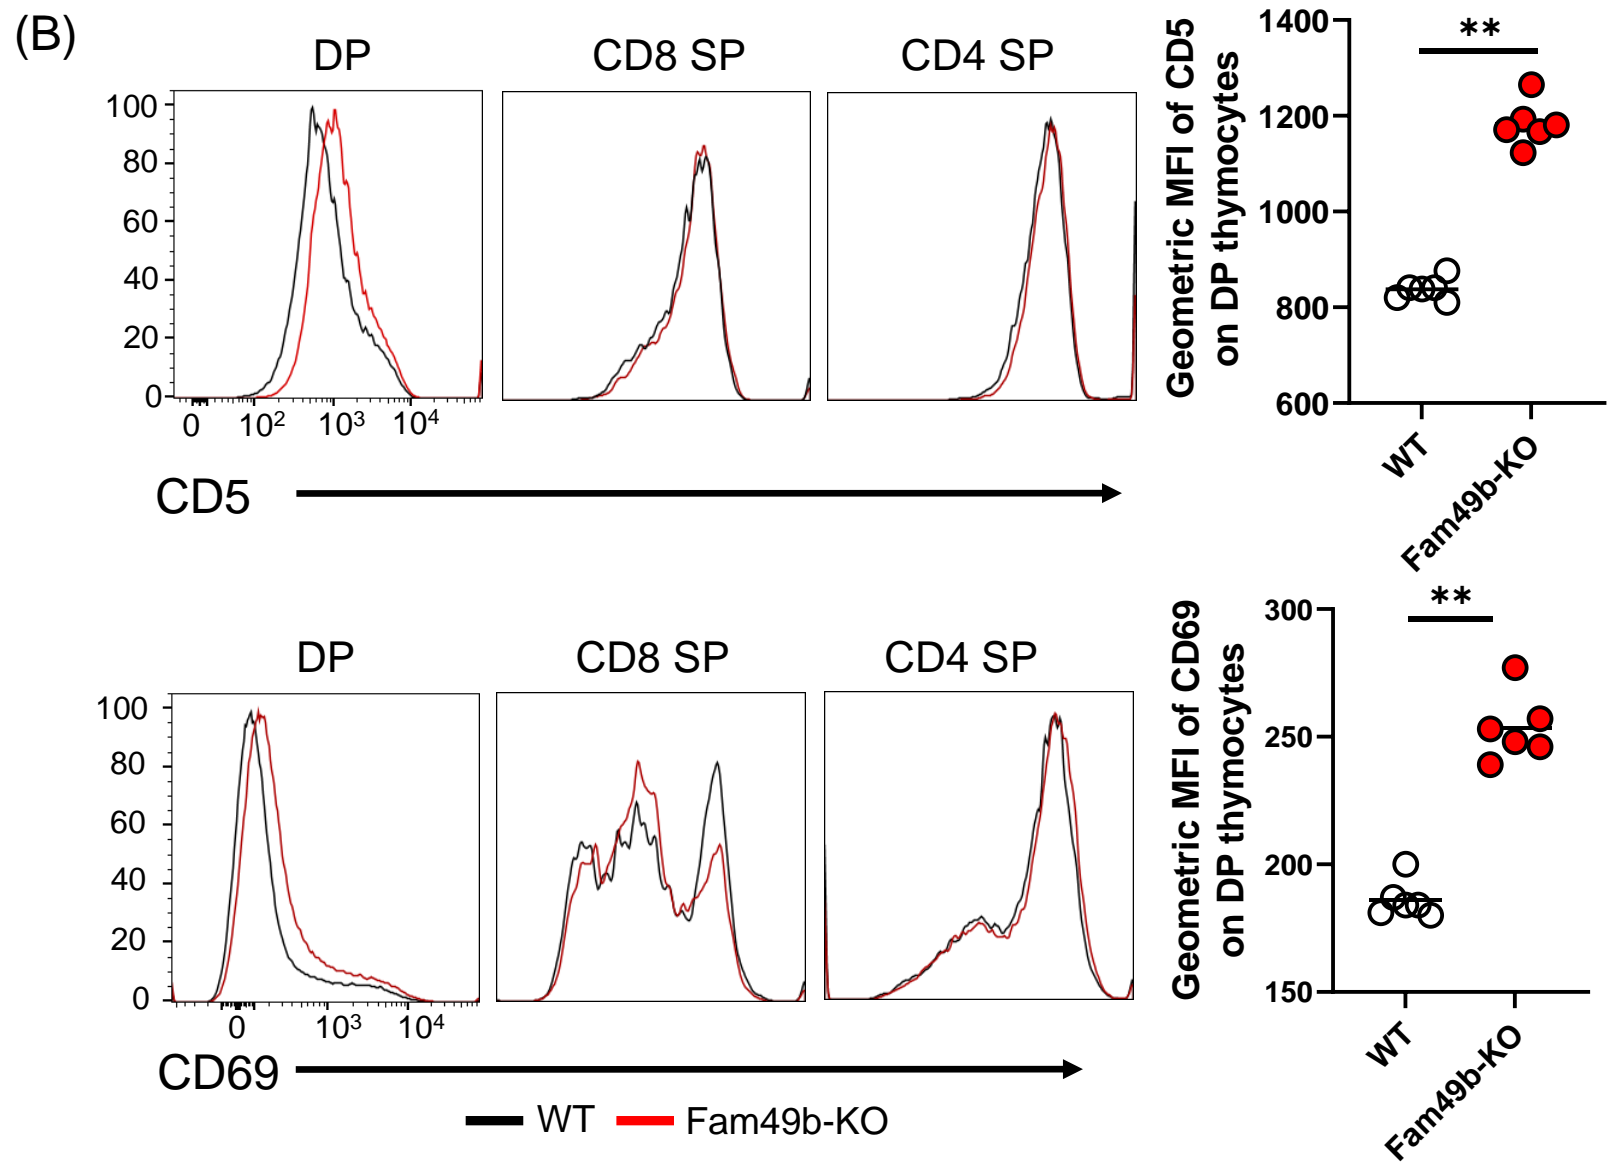

Figure 4.

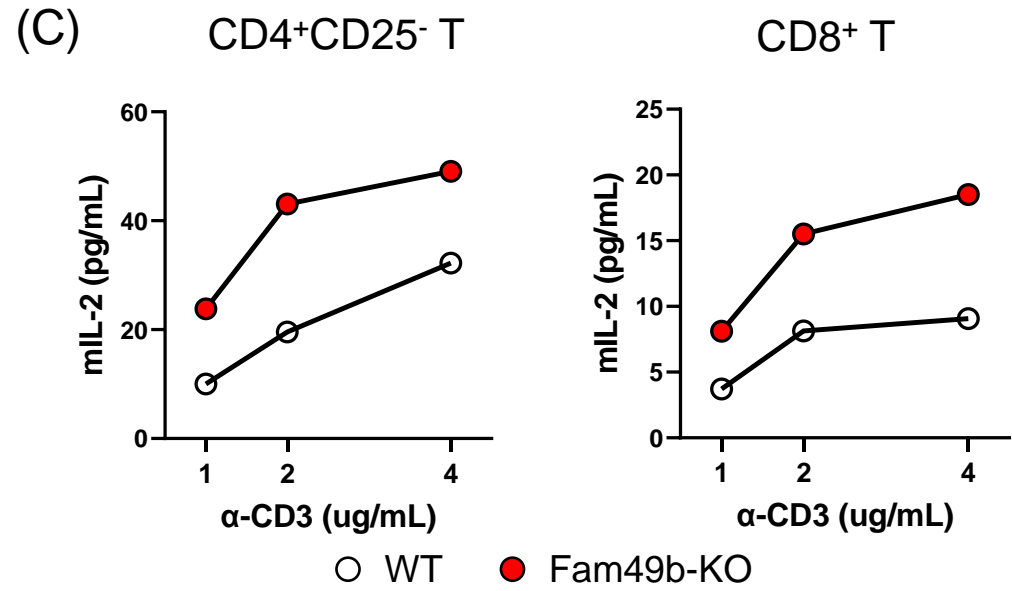

Figure 5.

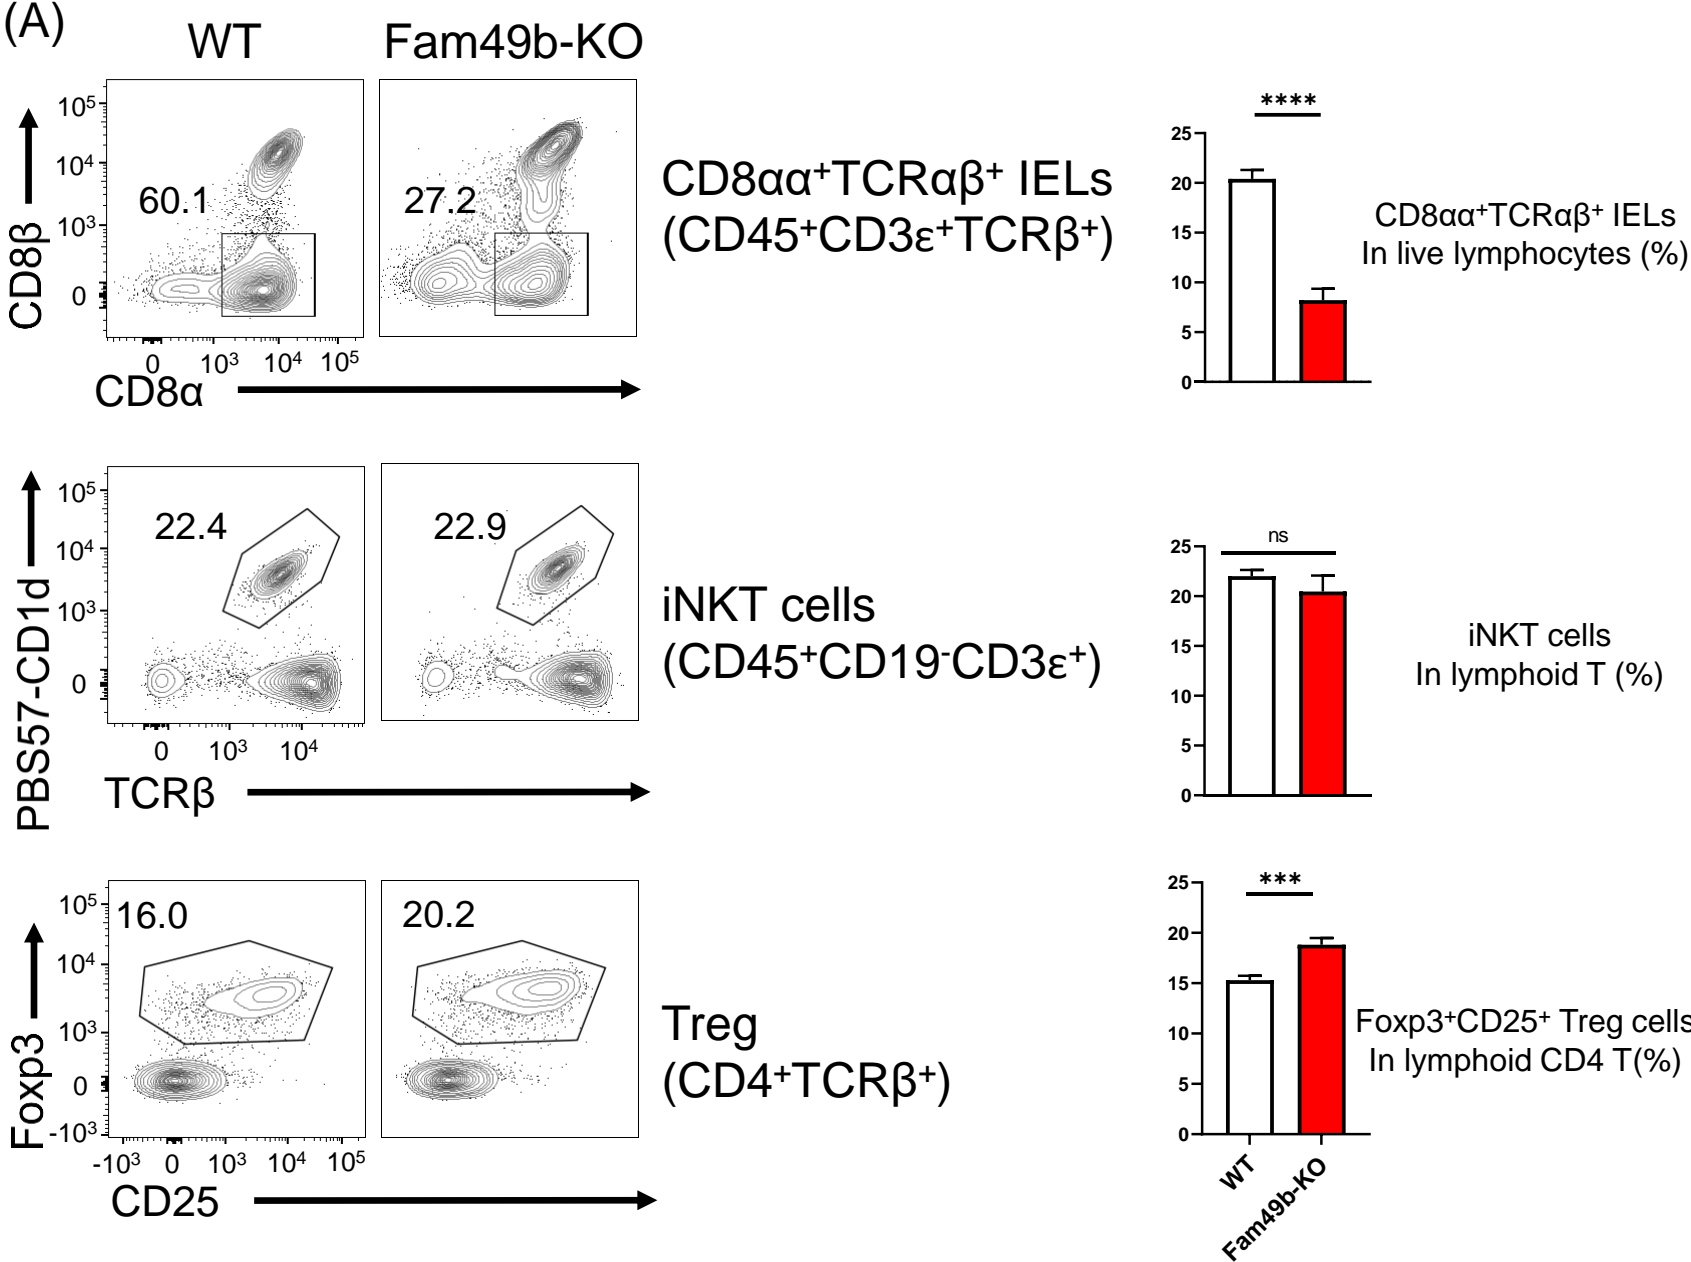

Figure 5.

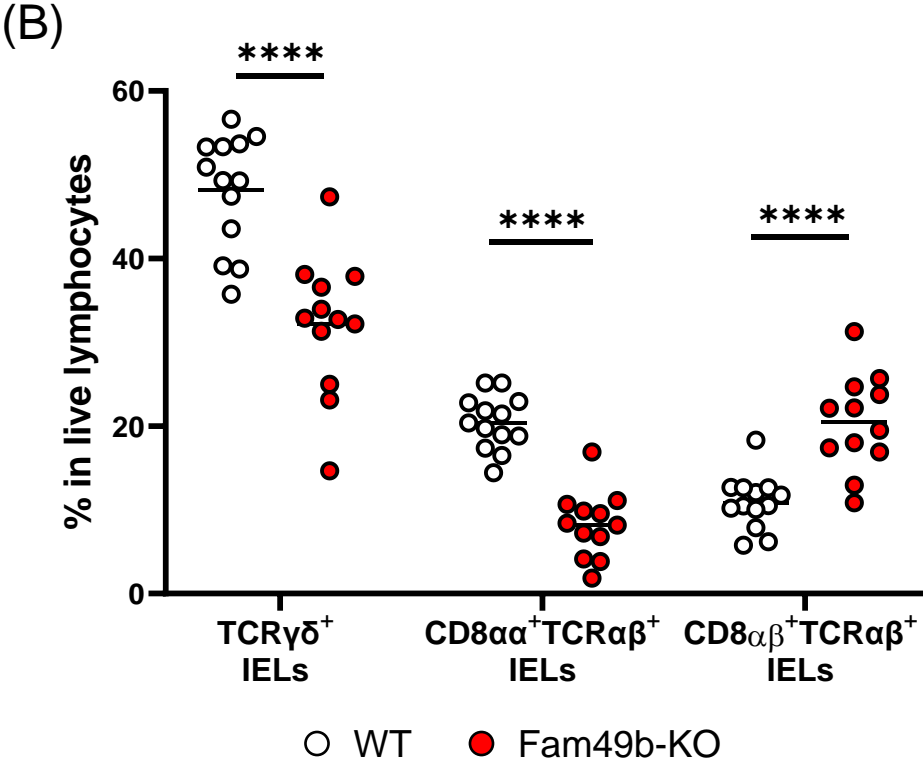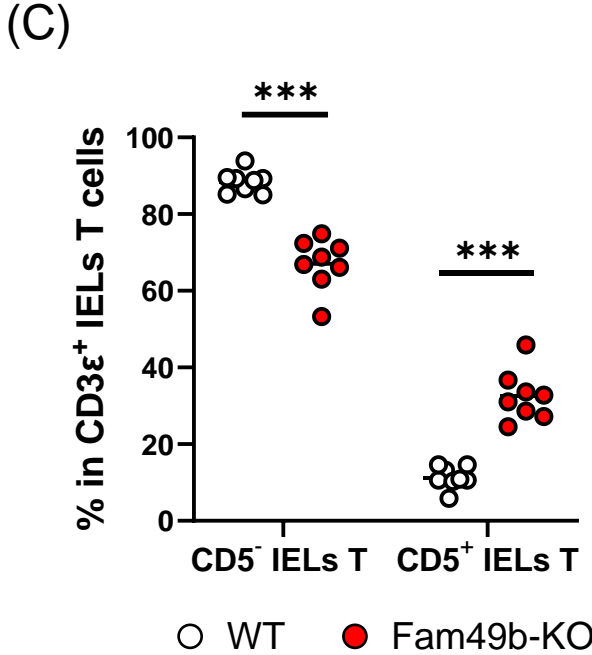

Supplementary Figure 1.

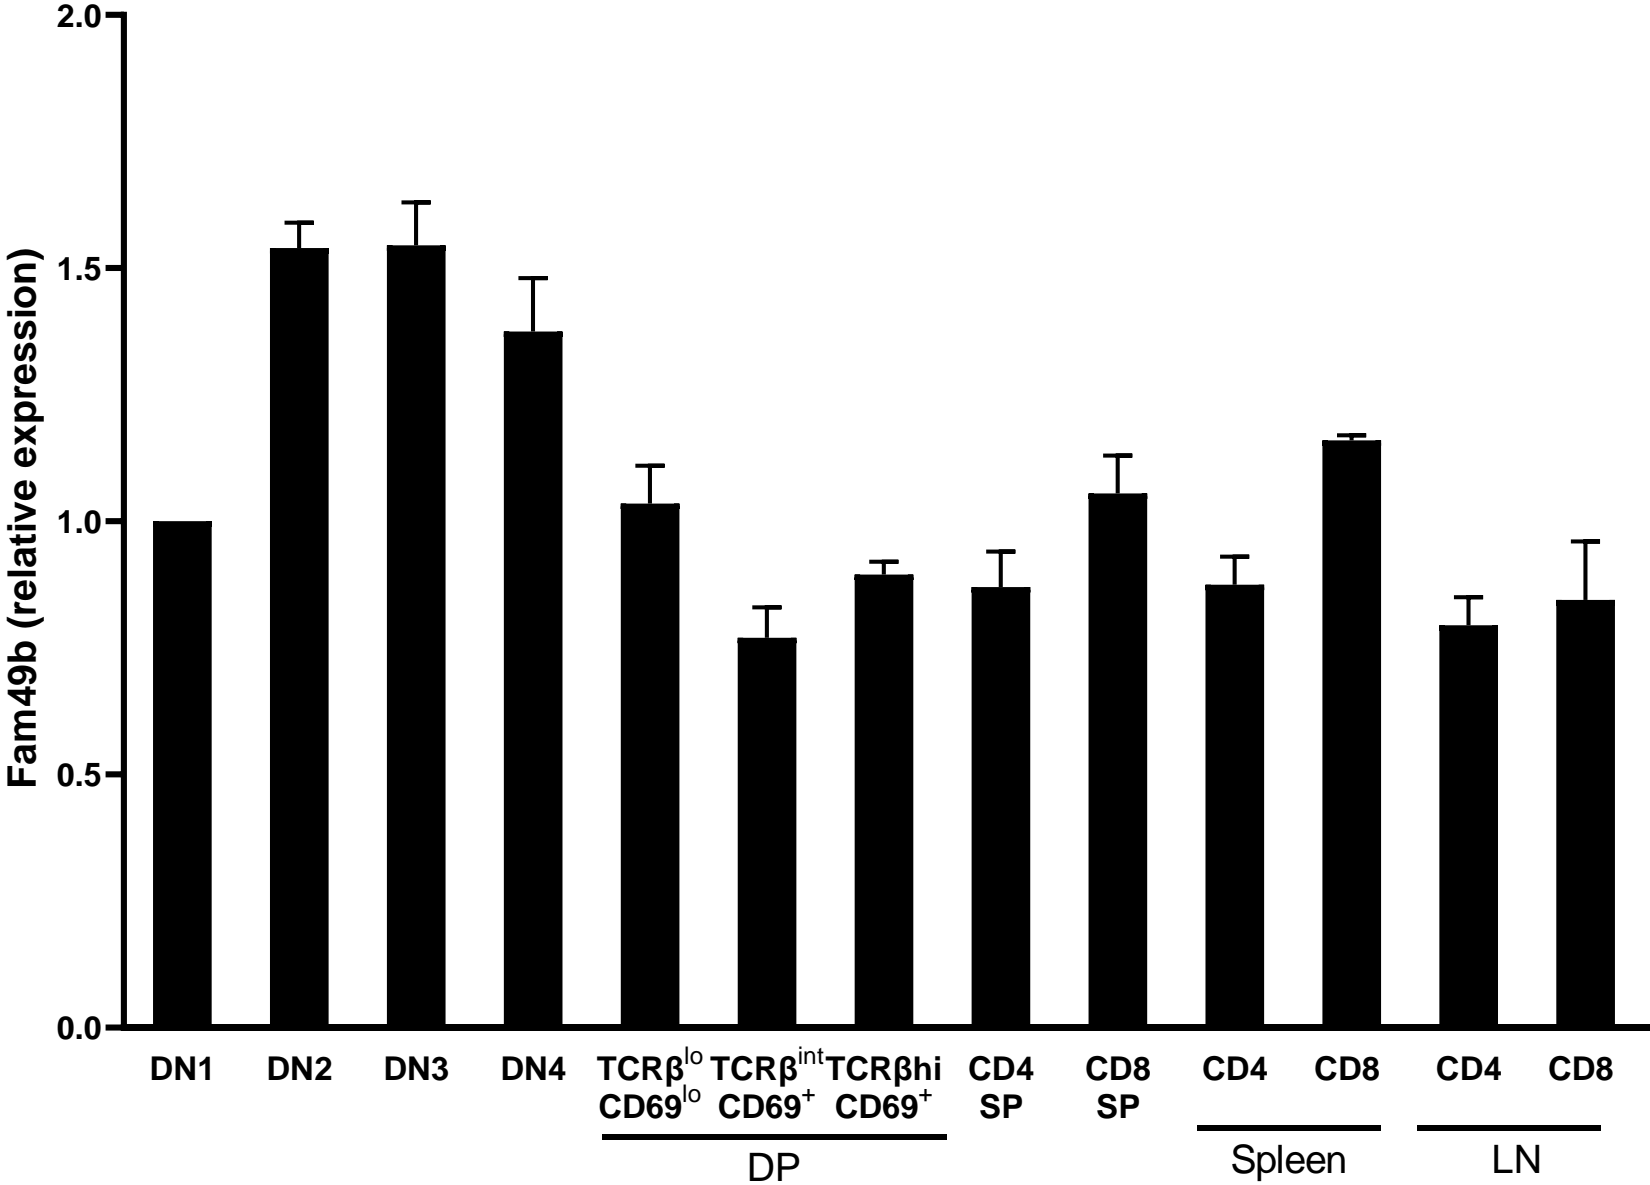

# Supplementary Figure 2.

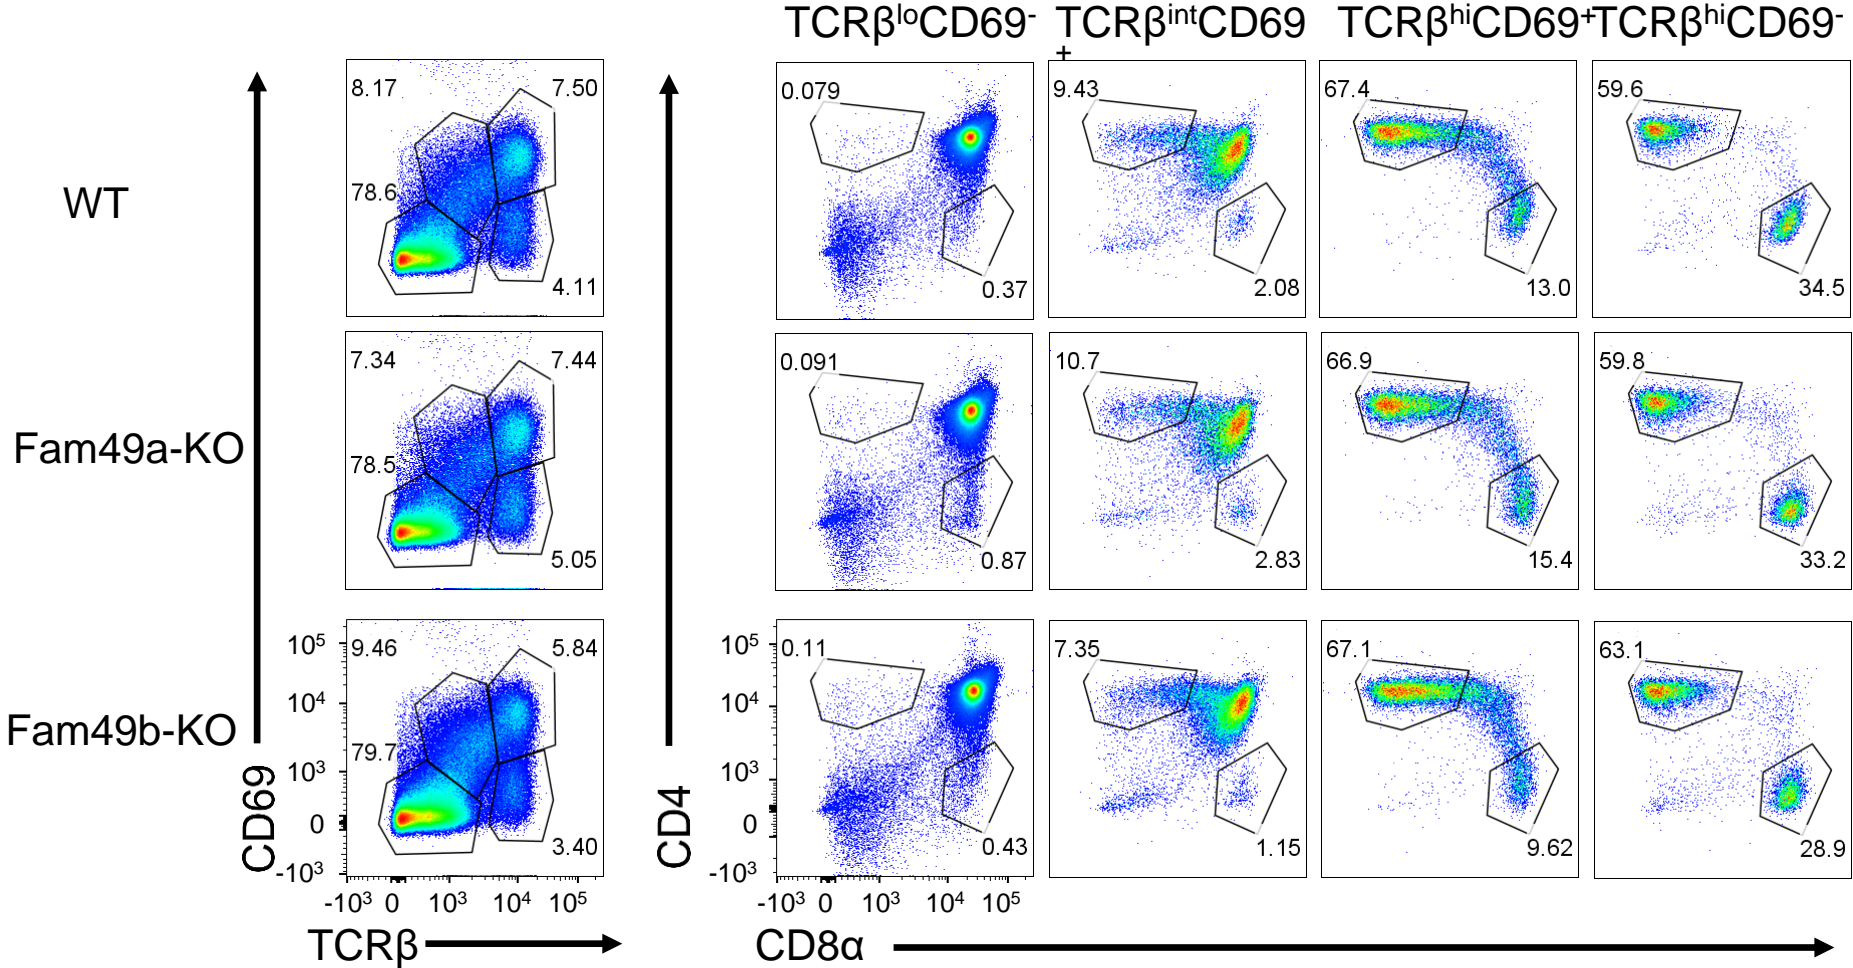

# Supplementary Figure 3.

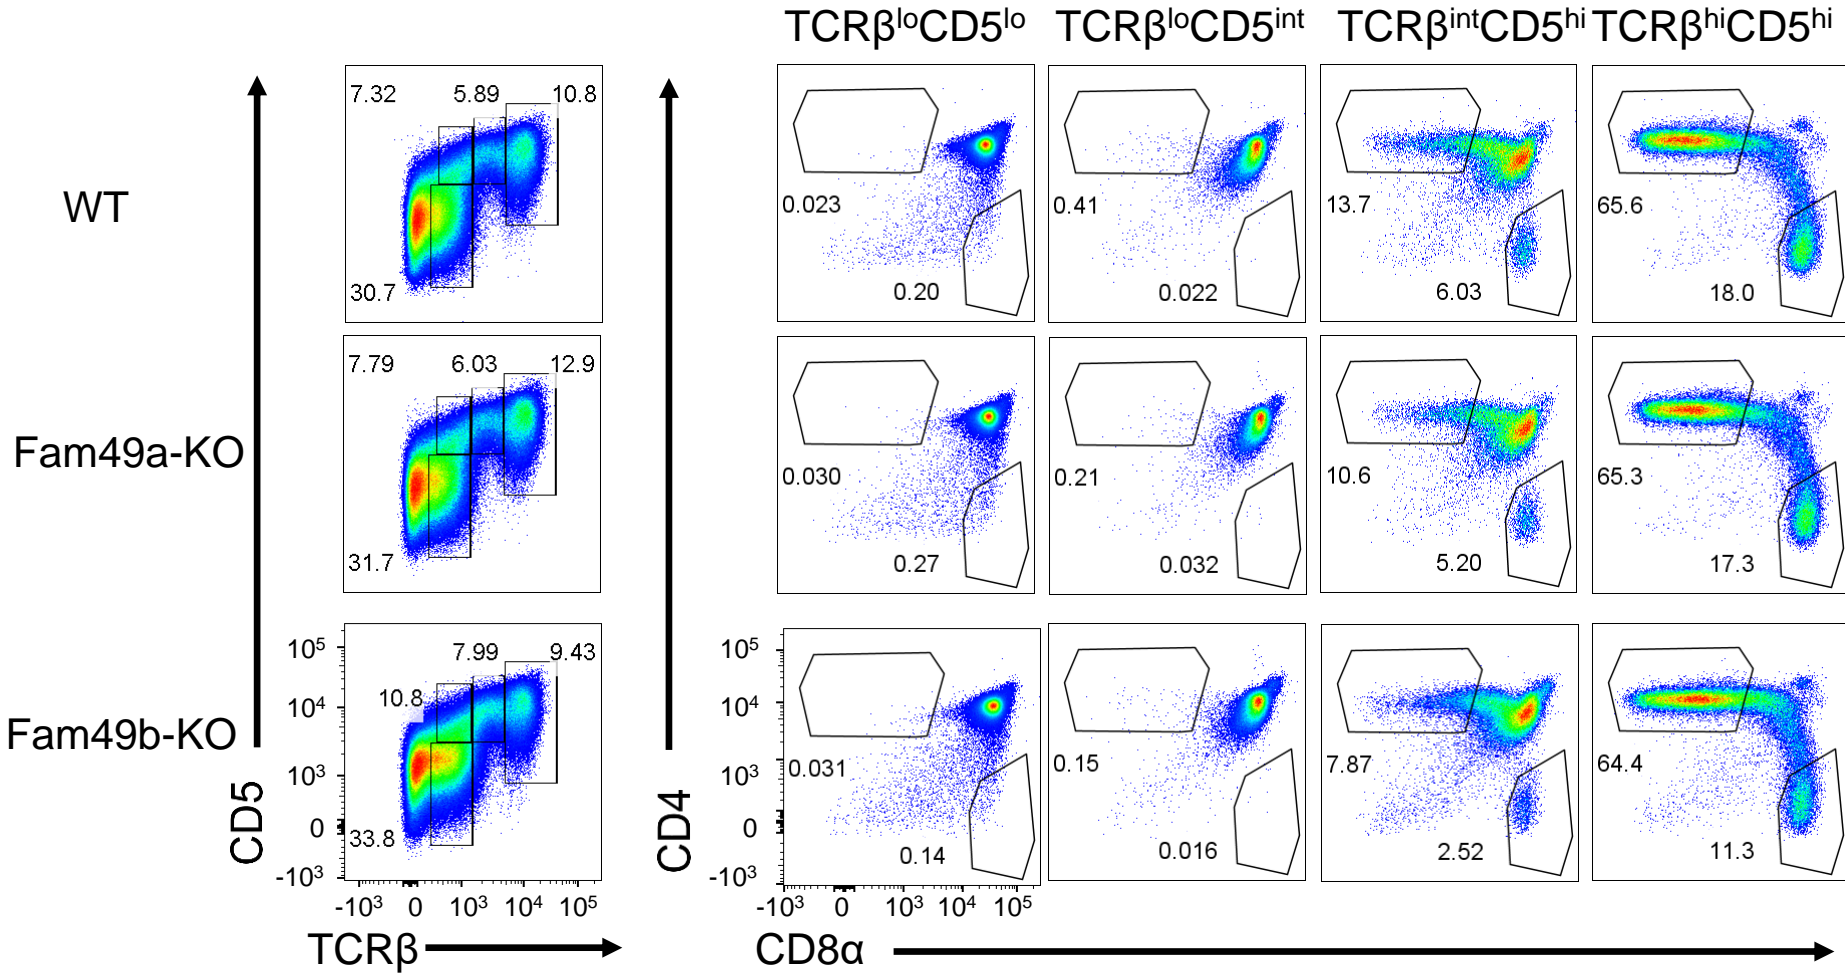



# Supplementary Figure 4.

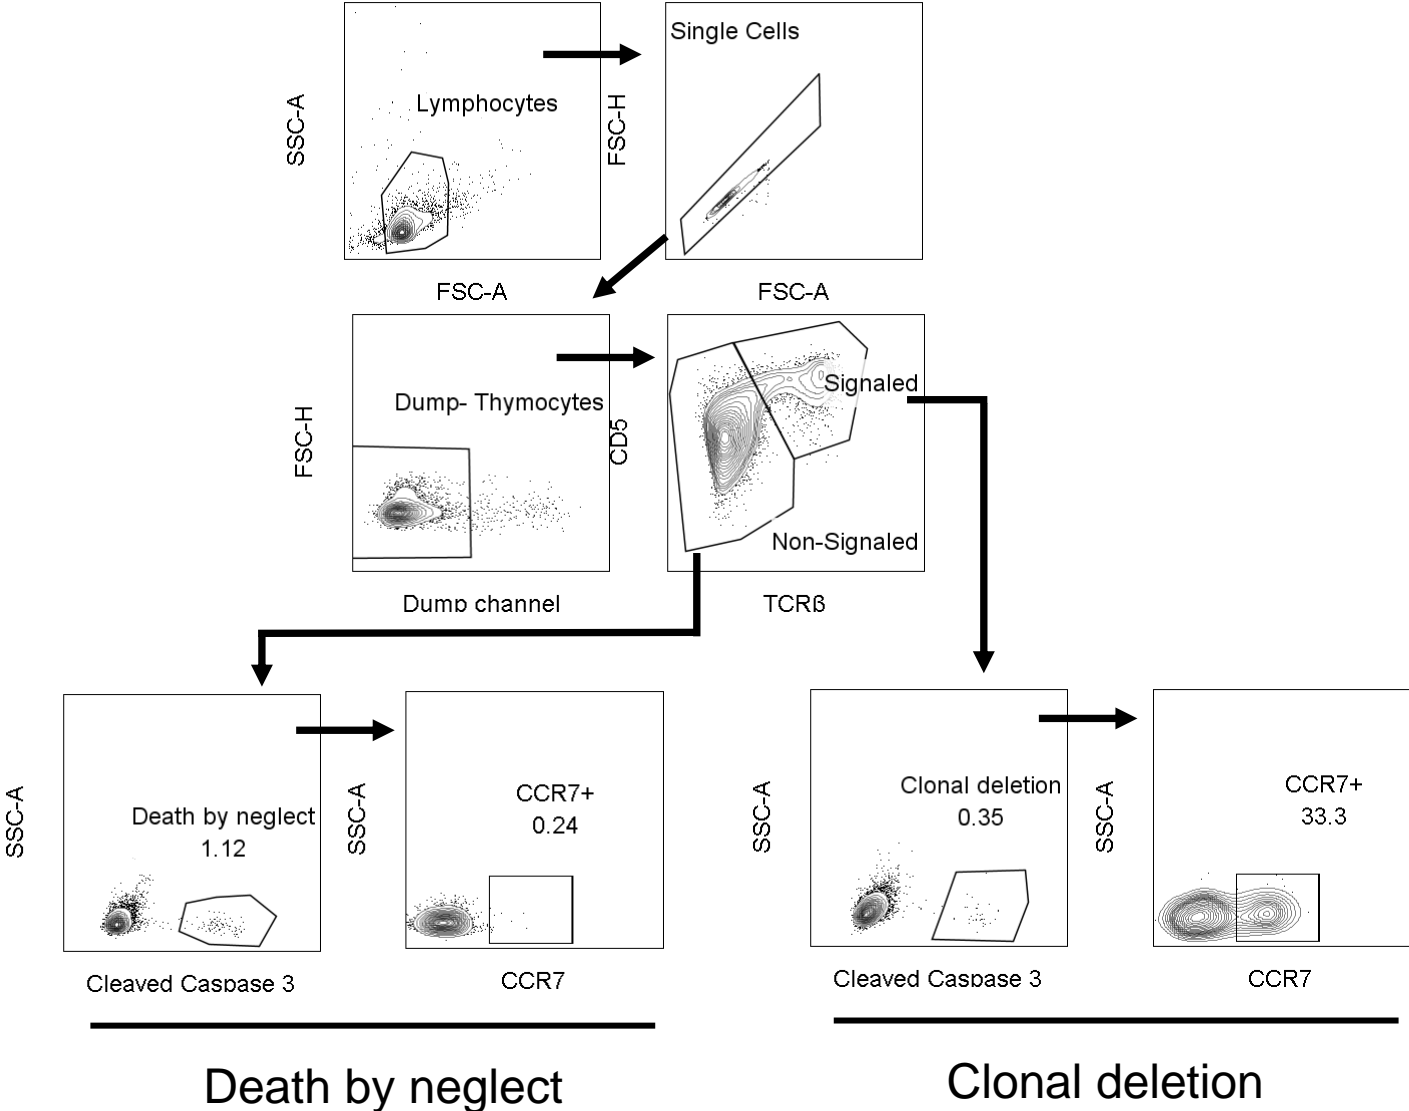

Dump channel : B220, NK1.1, TCR $\gamma\delta$ , CD11b, Ly-6C, L6-6G, CD25

# Supplementary Figure 5.

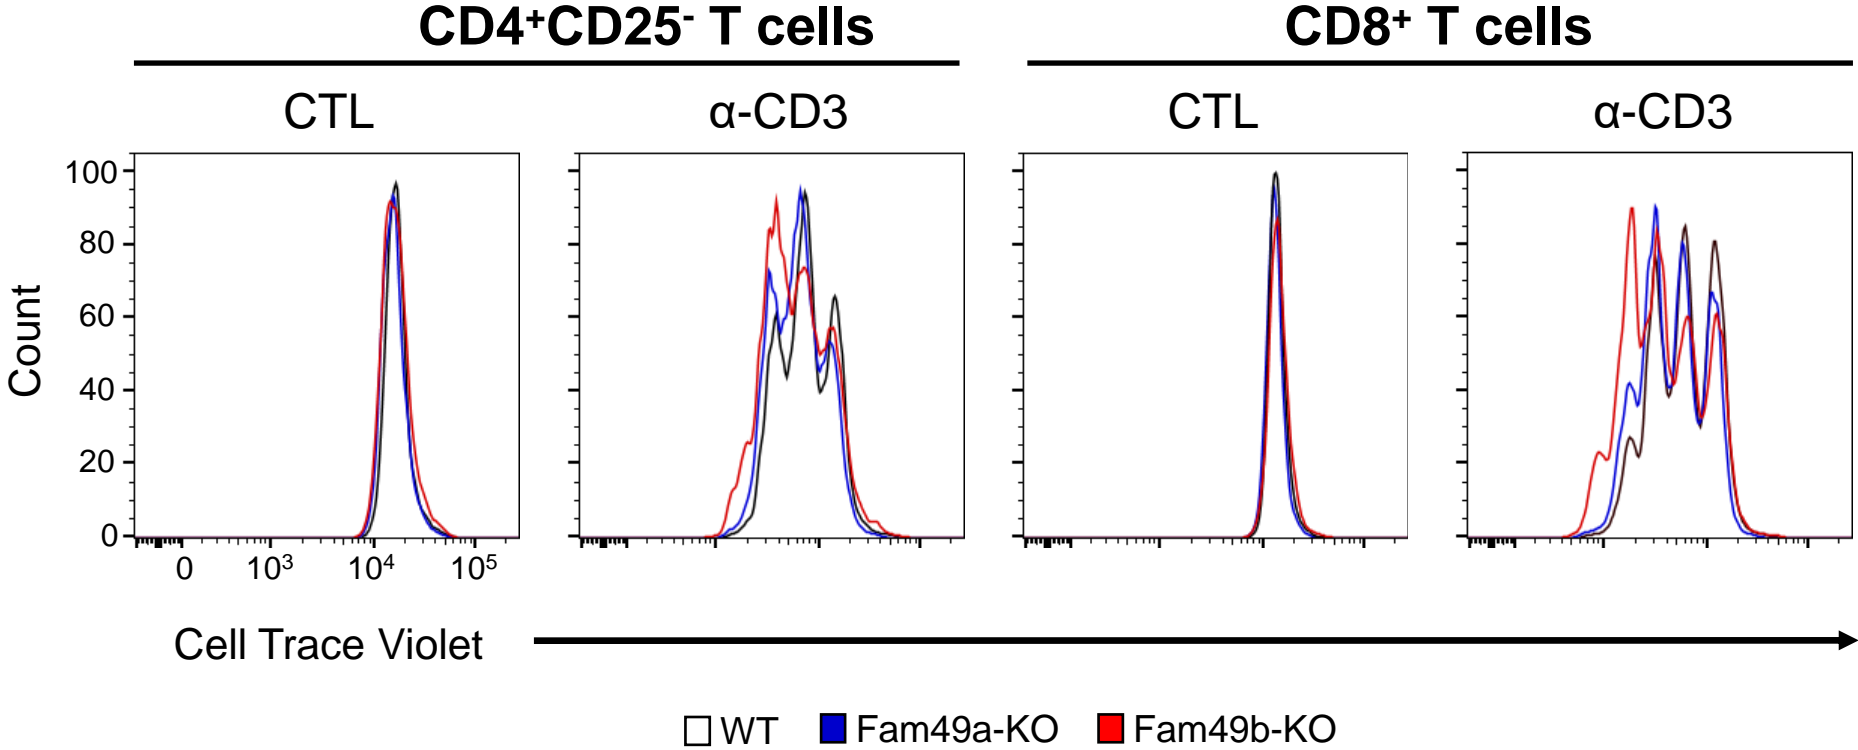

# Supplementary Figure 6.

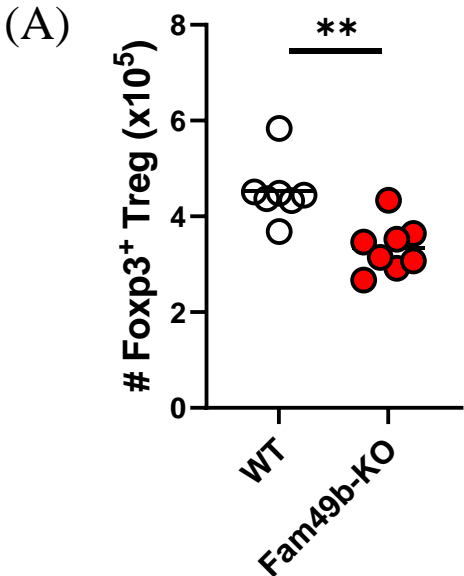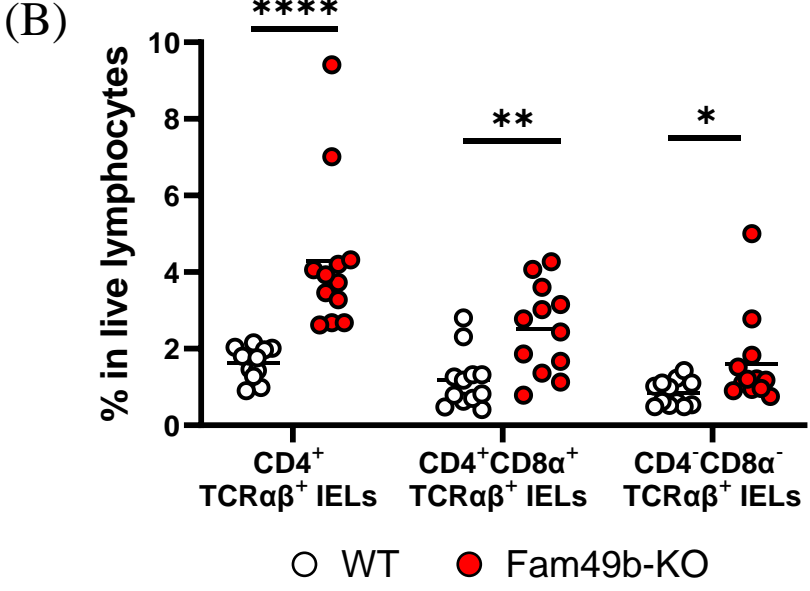

Source: http://biorxiv.org/content/10.1101/2022.01.18.476719v1.full.pdf
